# Supplementary material for: Making sense of fossils and artefacts: a review of best practices for the design of a successful workflow for machine learning-assisted citizen science projects
Source: PeerJ. 2025 Feb 13;13:e18927. doi: 10.7717/peerj.18927 (PMC11830368; doi:10.7717/peerj.18927)
Supplement: Supplemental Information 1 [file peerj-13-18927-s001.xlsx]

## Sheet: Supplemental Data S1
Title: Making sense of fossils and artefacts: A review of best practices for the design of a successful workflow for machine learning-assisted citizen science projects.
Journal: PeerJ
1st Author: Isaak Eijkelboom; Naturalis Biodiversity Center, Darwinweg 2, 2333 CR Leiden, the Netherlands; Department of Earth Sciences, Faculty of Geosciences, Utrecht University, Princetonlaan 8A, 3584 CB Utrecht, the Netherlands; isaak.eijkelboom@naturalis.nl
Supplemental Data S1 General characterisation of reviewed articles
title	year	journal	issn	volume	pages	authors	location	notes	doi	keywords
A comparison of machine learning techniques for taxonomic classification of teeth from the Family Bovidae	2018	JOURNAL OF APPLIED STATISTICS	["0266-4763", "1360-0532 J9 - J APPL STAT JI - J. Appl. Stat."]	45	2773-2787	Matthews, GJ and Brophy, JK and Luetkemeier, M and Gu, HI and Thiruvathukal, GK	["Loyola Univ, Dept Math & Stat, Chicago, IL 60660 USA", "Louisiana State Univ, Dept Anthropol, Baton Rouge, LA 70803 USA", "Loyola Univ, Dept Comp Sci, Chicago, IL 60611 USA", "Argonne Natl Lab, 9700 S Cass Ave, Argonne, IL 60439 USA"]	Times Cited in Web of Science Core Collection: 5 Total Times Cited: 5 Cited Reference Count: 20	10.1080/02664763.2018.1441381 WE - Science Citation Index Expanded (SCI-EXPANDED) WE - Social Science Citation Index (SSCI)	Classification;machine learning;anthropology;GAUTENG PROVINCE;PLOVERS LAKE
A deep-learning model for predictive archaeology and archaeological community detection	2021	HUMANITIES & SOCIAL SCIENCES COMMUNICATIONS	2662-9992 J9 - HUM SOC SCI COMMUN JI - Hum. Soc. Sci. Commun.	8		Resler, A and Yeshurun, R and Natalio, F and Giryes, R	["Tel Aviv Univ, Sch Elect Engn, Tel Aviv, Israel", "Univ Haifa, Zinman Inst Archaeol, Mt Carmel, Haifa, Israel", "Weizmann Inst Sci, Kimmel Ctr Archaeol Sci, Rehovot, Israel"]	Times Cited in Web of Science Core Collection: 2 Total Times Cited: 2 Cited Reference Count: 44	10.1057/s41599-021-00970-z WE - Social Science Citation Index (SSCI) WE - Arts &amp; Humanities Citation Index (A&amp;HCI)
A Granularity-Based Intelligent Tutoring System for Zooarchaeology	2019	APPLIED SCIENCES-BASEL	2076-3417 J9 - APPL SCI-BASEL JI - Appl. Sci.-Basel	9		Subirats, L and Perez, L and Hernandez, C and Fort, S and Sacha, GM	["Eurecat, Ctr Tecnol Catalunya, C Bilbao 72, Barcelona 08005, Spain", "Univ Oberta Catalunya, Fac Comp Sci Multimedia & Telecommun, Rambla Poblenou 156, Barcelona 08018, Spain", "Inst Catala Paleoecol Humana & Evolucio Social, IPHES, Zona Educ 4,Campus Sescelades URV,Edif W3, Tarragona 43007, Spain", "Univ Rovira & Virgili, Area Prehist, Avinguda Catalunya 35, Tarragona 43002, Spain", "Univ Lagu…	Times Cited in Web of Science Core Collection: 2 Total Times Cited: 2 Cited Reference Count: 48	10.3390/app9224960 WE - Science Citation Index Expanded (SCI-EXPANDED) WE - Social Science Citation Index (SSCI)	supervised learning;zooarchaeology;intelligent tutoring system;ARCHAEOLOGICAL DATA;EL SALT;PATTERNS;Intelligence
A Pilot Study on Remote Sensing and Citizen Science for Archaeological Prospection	2020	REMOTE SENSING	2072-4292 J9 - REMOTE SENS-BASEL JI - Remote Sens.	12		Stewart, C and Labreche, G and Gonzalez, DL	["European Space Agcy, Earth Observat Programmes Directorate, Future Syst Dept, I-00044 Frascati, Italy", "Scifabric Ltd, Southampton SO15 3FG, Hants, England"]	Times Cited in Web of Science Core Collection: 8 Total Times Cited: 8 Cited Reference Count: 64	10.3390/rs12172795 WE - Science Citation Index Expanded (SCI-EXPANDED) WE - Social Science Citation Index (SSCI)	archaeology;prospection;crowdsourcing;citizen science;cropmarks;remote sensing;Bing Maps;earth observation;Rome;CROP MARKS;LIDAR;IDENTIFICATION;INFORMATION;LANDSCAPE;REMAINS;EARTH;TOOL;Pilot Projects
A survey of computational methods for fossil data analysis	2017	EVOLUTIONARY ECOLOGY RESEARCH	["1522-0613", "1937-3791 J9 - EVOL ECOL RES JI - Evol. Ecol. Res."]	18	477-502 WE - Science Citation Index Expanded (SCI-EXPANDED)	Zliobaite, I and Puolamaki, K and Eronen, JT and Fortelius, M	["Univ Helsinki, Dept Geosci & Geog, FIN-00014 Helsinki, Finland", "Univ Helsinki, Dept Comp Sci, Helsinki, Finland", "Finnish Inst Occupat Hlth, Helsinki, Finland", "BIOS Res Unit, Helsinki, Finland", "Univ Oslo, CEES, Oslo, Norway"]	Times Cited in Web of Science Core Collection: 1 Total Times Cited: 1 Cited Reference Count: 131		big data;computational fossil data analysis;data mining;ecometrics;evolutionary palaeontology;machine learning;mammals;COEXISTENCE APPROACH;MAMMAL COMMUNITIES;MISSING DATA;CLIMATE;PRODUCTIVITY;OCCUPANCY;ABUNDANCE;NEOGENE;TRAITS;MODELS;Statistics as Topic
A Tale of Two Crowds: Public Engagement in Plankton Classification	2017	FRONTIERS IN MARINE SCIENCE	2296-7745 J9 - FRONT MAR SCI JI - Front. Mar. Sci.	4		Robinson, KL and Luo, JY and Sponaugle, S and Guigand, C and Cowen, RK	["Oregon State Univ, Hatfield Marine Sci Ctr, Newport, OR 97365 USA", "Oregon State Univ, Dept Integrat Biol, Corvallis, OR 97331 USA", "Univ Miami, Rosenstiel Sch Marine & Atmospher Sci, Dept Marine Biol & Ecol, 4600 Rickenbacker Causeway, Miami, FL 33149 USA", "Univ Louisiana Lafayette, Dept Biol, Lafayette, LA 70504 USA", "Natl Ctr Atmospher Res, Climate & Global Dynam Lab, POB 3000, Boulder, …	Times Cited in Web of Science Core Collection: 19 Total Times Cited: 19 Cited Reference Count: 37	10.3389/fmars.2017.00082 WE - Science Citation Index Expanded (SCI-EXPANDED)	marine science;plankton;big data;crowd-sourcing;machine learning;citizen science;PERFORMANCE;RESOLUTION;SCIENCE
A Web service platform for Web-accessible archaeological databases	2005	COMPUTER AND INFORMATION SICENCES - ISCIS 2005, PROCEEDINGS	["0302-9743", "3-540-29414-7 J9 - LECT NOTES COMPUT SC"]	3733	362-370 WE - Conference Proceedings Citation Index - Science (CPCI-S) WE - Science Citation Index Expanded (SCI-EXPANDED)	Saykol, E and Saygin, Y and Ercil, A and Willis, A and Cooper, D and Joukowski, MS	["Sabanci Univ, Fac Engn & Nat Sci, TR-34956 Istanbul, Turkey", "Brown Univ, Div Engn, Providence, RI 02912 USA"]	Times Cited in Web of Science Core Collection: 0 Total Times Cited: 0 Cited Reference Count: 7		IMAGES
An automated pipeline for supervised classification of petal color from citizen science photographs	2023	APPLICATIONS IN PLANT SCIENCES	2168-0450 J9 - APPL PLANT SCI JI - Appl. Plant Sci.	11		Perez-Udell, RA and Udell, AT and Chang, SM	["Univ Georgia, Dept Plant Biol, 2502 Miller Plant Sci,120 Carlton St, Athens, GA 30602 USA", "Univ North Georgia, Dept Biol, 151G Hlth & Nat Sci,159 Sunset Dr, Dahlonega, GA 30533 USA"]	Times Cited in Web of Science Core Collection: 0 Total Times Cited: 0 Cited Reference Count: 31	10.1002/aps3.11505	citizen science;flower color;Geranium;image segmentation;Linanthus;supervised learning;FLOWER COLOR;SELECTION;Color
An Image-Based Class Retrieval System for Roman Republican Coins	2020	ENTROPY	1099-4300 J9 - ENTROPY-SWITZ JI - Entropy	22		Anwar, H and Sabetghadam, S and Bell, P	["Friedrich Alexander Univ, Interdisciplinary Ctr Digital Humanities & Social, D-91052 Erlangen, Germany", "COMSATS Univ Islamabad, Dept Elect & Comp Engn, Attock Campus, Attock City 43600, Pakistan", "Vienna Univ Technol, Inst Software Technol & Interact Syst, A-1040 Vienna, Austria"]	Times Cited in Web of Science Core Collection: 1 Total Times Cited: 1 Cited Reference Count: 15	10.3390/e22080799 WE - Science Citation Index Expanded (SCI-EXPANDED)	image entropy;image processing;image classification
An Open System for Collection and Automatic Recognition of Pottery through Neural Network Algorithms	2021	HERITAGE	2571-9408 J9 - HERITAGE-BASEL JI - Heritage	4	140-159	Gualandi, ML and Gattiglia, G and Anichini, F	Univ Pisa, Dept Knowledge & Forms Civilisat, I-56126 Pisa, Italy	Times Cited in Web of Science Core Collection: 9 Total Times Cited: 9 Cited Reference Count: 54	10.3390/heritage4010008 WE - Emerging Sources Citation Index (ESCI)	artificial intelligence;archaeology;pottery recognition;Nerve Net;Neural Networks (Computer);Algorithms
Applications of deep learning to decorated ceramic typology and classification: A case study using Tusayan White Ware from Northeast Arizona	2021	JOURNAL OF ARCHAEOLOGICAL SCIENCE	["0305-4403", "1095-9238 J9 - J ARCHAEOL SCI JI - J. Archaeol. Sci."]	130		Pawlowicz, LM and Downum, CE	No Arizona Univ, Dept Anthropol, POB 15200, Flagstaff, AZ 86011 USA	Times Cited in Web of Science Core Collection: 11 Total Times Cited: 11 Cited Reference Count: 89	10.1016/j.jas.2021.105375	Ceramic typology;Deep learning;Convolutional neural networks;Tusayan White Ware;Southwest archaeology;Arizona archaeology;Arizona;European Continental Ancestry Group
Applying automated object detection in archaeological practice: A case study from the southern Netherlands	2022	ARCHAEOLOGICAL PROSPECTION	["1075-2196", "1099-0763 J9 - ARCHAEOL PROSPECT JI - Archaeol. Prospect."]	29	15-31	Verschoof-van der Vaart, WB and Lambers, K	["Leiden Univ, Fac Archaeol, POB 9514, NL-2300 RA Leiden, South Holland, Netherlands", "Leiden Univ, Data Sci Res Programme, Leiden Ctr Data Sci, POB 9514, NL-2300 RA Leiden, South Holland, Netherlands"]	Times Cited in Web of Science Core Collection: 10 Total Times Cited: 10 Cited Reference Count: 94	10.1002/arp.1833	archaeological prospection;deep learning;landscape archaeology;Lidar;Netherlands;object detection;CITIZEN SCIENCE;REMAINS;REGION;MODELS
Artificial Intelligence Meets Citizen Science to Supercharge Ecological Monitoring	2020	PATTERNS	2666-3899 J9 - PATTERNS JI - Patterns	1		McClure, EC and Sievers, M and Brown, CJ and Buelow, CA and Ditria, EM and Hayes, MA and Pearson, RM and Tulloch, VJD and Unsworth, RKF and Connolly, R	["Griffith Univ, Sch Environm & Sci, Australian Rivers Inst Coast & Estuaries, Gold Coast, Qld 4222, Australia", "Griffith Univ, Sch Environm & Sci, Australian Rivers Inst Coast & Estuaries, Nathan, Qld 4111, Australia", "Univ British Columbia, Dept Forest & Conservat Sci, Vancouver, BC, Canada", "Swansea Univ, Coll Sci, Seagrass Ecosyst Res Grp, Swansea SA2 8PP, W Glam, Wales"]	Times Cited in Web of Science Core Collection: 15 Total Times Cited: 16 Cited Reference Count: 60	10.1016/j.patter.2020.100109 WE - Emerging Sources Citation Index (ESCI)	CONSERVATION;EXTINCTION;CHALLENGES;BENEFITS;SHIFTS;EBIRD;TOOL;Intelligence
Auroral classification ergonomics and the implications for machine learning	2020	GEOSCIENTIFIC INSTRUMENTATION METHODS AND DATA SYSTEMS	["2193-0856", "2193-0864 J9 - GEOSCI INSTRUM METH JI - Geosci. Instrum. Methods Data Syst."]	9	267-273	McKay, D and Kvammen, A	["NORCE Norwegian Res Ctr AS, Tromso, Norway", "UiT Arctic Univ Norway, Dept Phys & Technol, Tromso, Norway"]	Times Cited in Web of Science Core Collection: 2 Total Times Cited: 2 Cited Reference Count: 9	10.5194/gi-9-267-2020 WE - Science Citation Index Expanded (SCI-EXPANDED)	Learning
Automatic Fungi Recognition: Deep Learning Meets Mycology	2022	SENSORS	1424-8220 J9 - SENSORS-BASEL JI - Sensors	22		Picek, L and Sulc, M and Matas, J and Heilmann-Clausen, J and Jeppesen, TS and Lind, E	["Univ West Bohemia, Fac Appl Sci, Dept Cybernet, Plzen 30100, Czech Republic", "Czech Tech Univ, Fac Elect Engn, Dept Cybernet, Prague 16636, Czech Republic", "Univ Copenhagen, Biol Inst, Ctr Macroecol Evolut & Climate, DK-1165 Copenhagen, Denmark", "Global Biodivers Informat Facil, DK-2100 Copenhagen, Denmark"]	Times Cited in Web of Science Core Collection: 4 Total Times Cited: 4 Cited Reference Count: 80	10.3390/s22020633 WE - Science Citation Index Expanded (SCI-EXPANDED)	fungi;species;classification;recognition;machine learning;computer vision;species recognition;fine-grained;artificial intelligence;CITIZEN SCIENCE;ECOLOGICAL RESEARCH;IDENTIFICATION;BIODIVERSITY;TOOL;Fungi;Learning
Automatic taxonomic identification based on the Fossil Image Dataset (>415,000 images) and deep convolutional neural networks	2023	PALEOBIOLOGY	["0094-8373", "1938-5331 J9 - PALEOBIOLOGY JI - Paleobiology"]			Liu, XK and Jiang, SY and Wu, R and Shu, WC and Hou, J and Sun, YF and Sun, JR and Chu, DL and Wu, YY and Song, HJ	China Univ Geosci, Sch Earth Sci, State Key Lab Biogeol & Environm Geol, Wuhan 430074, Peoples R China	Times Cited in Web of Science Core Collection: 8 Total Times Cited: 8 Cited Reference Count: 105	10.1017/pab.2022.14	CLASSIFICATION;FORAMINIFERA;RECOGNITION;Nerve Net;Neural Networks (Computer)
Citizen Science and Climate Change: Mapping the Range Expansions of Native and Exotic Plants with the Mobile App Leafsnap	2018	BIOSCIENCE	["0006-3568", "1525-3244 J9 - BIOSCIENCE JI - Bioscience"]	68	348-358	Kress, WJ and Garcia-Robledo, C and Soares, JVB and Jacobs, D and Wilson, K and Lopez, IC and Belhumeur, PN	["Smithsonians Natl Museum Nat Hist, Washington, DC 20560 USA", "Smithsonians Natl Museum Nat Hist, Bot, Washington, DC 20560 USA", "Univ Connecticut, Storrs, CT USA", "Univ Connecticut, Dept Ecol & Evolut, Storrs, CT USA", "Yahoo New York, New York, NY USA", "Univ Maryland, Comp Sci, College Pk, MD 20742 USA", "Jerusalem Bot Gardens, Jerusalem, Israel", "Smithsonians Natl Museum Nat Hist, Bot De…	Times Cited in Web of Science Core Collection: 18 Total Times Cited: 20 Cited Reference Count: 30	10.1093/biosci/biy019 WE - Science Citation Index Expanded (SCI-EXPANDED) WE - Social Science Citation Index (SSCI)	climate change;citizen science;identification;geographic distribution;deep learning;IDENTIFICATION;KNOWLEDGE
CITIZEN SCIENCE AND GAMIFICATION FOR CULTURAL HERITAGE	2020	EGA-REVISTA DE EXPRESION GRAFICA ARQUITECTONICA	["1133-6137", "2254-6103 J9 - EGA-REV EXPRES GRAF JI - EGA-Rev. Expres. Graf. Arquit."]	25	232-239	Senatore, L and Gallozzi, A and Cigola, M and Strollo, RM		Times Cited in Web of Science Core Collection: 1 Total Times Cited: 1 Cited Reference Count: 7	10.4995/ega.2020.11586 WE - Arts &amp; Humanities Citation Index (A&amp;HCI)	CULTURAL HERITAGE;GAMIFICACION;CITIZEN SCIENCE;SURVEY;VALORIZATION;ICT
Citizen science archaeological finds on the Semantic Web: the FindSampo framework	2021	ANTIQUITY	["0003-598X", "1745-1744 J9 - ANTIQUITY JI - Antiquity"]	95		Hyvonen, E and Rantala, H and Ikkala, E and Koho, M and Tuominen, J and Anafi, B and Thomas, S and Wessman, A and Oksanen, E and Rohiola, V and Kuitunen, J and Ryyppo, M	["Aalto Univ, Dept Comp Sci, Espoo, Finland", "Univ Helsinki, Helsinki Ctr Digital Humanities, Helsinki, Finland", "Univ Helsinki, Dept Cultures, Helsinki, Finland", "Finnish Heritage Agcy, Helsinki, Finland"]	Times Cited in Web of Science Core Collection: 3 Total Times Cited: 3 Cited Reference Count: 14	10.15184/aqy.2021.87 WE - Social Science Citation Index (SSCI) WE - Arts &amp; Humanities Citation Index (A&amp;HCI)	Finland;citizen science;metal detecting;archaeology;linked open data;Semantic Web;Semantics
Citizen science decisions: A Bayesian approach optimises effort	2021	ECOLOGICAL INFORMATICS	["1574-9541", "1878-0512 J9 - ECOL INFORM JI - Ecol. Inform."]	63		Mugford, J and Moltchanova, E and Plank, M and Sullivan, J and Byrom, A and James, A	["Univ Canterbury, Sch Math & Stat, Christchurch, New Zealand", "New Zealand Ctr Res Excellence, Te Punaha Matatini, Auckland, New Zealand", "Lincoln Univ, Fac Agr & Life Sci, Lincoln, New Zealand", "Manaaki Whenua Landcare Res, Lincoln, New Zealand"]	Times Cited in Web of Science Core Collection: 2 Total Times Cited: 2 Cited Reference Count: 24	10.1016/j.ecoinf.2021.101313	Citizen science;Bayesian inference;Image classification;Collective decisions;Effort optimisation;Gibbs sampling;iNaturalist;CROWD
Citizen science frontiers: Efficiency, engagement, and serendipitous discovery with human-machine systems	2019	PROCEEDINGS OF THE NATIONAL ACADEMY OF SCIENCES OF THE UNITED STATES OF AMERICA	["0027-8424", "1091-6490 J9 - P NATL ACAD SCI USA JI - Proc. Natl. Acad. Sci. U. S. A."]	116	1902-1909	Trouille, L and Lintott, CJ and Fortson, LF	["Adler Planetarium, Dept Citizen Sci, Chicago, IL 60605 USA", "Northwestern Univ, Ctr Interdisciplinary Explorat & Res Astrophy, Evanston, IL 60208 USA", "Univ Oxford, Dept Phys, Oxford OX1 3RH, England", "Univ Minnesota Twin Cities, Dept Phys & Astron, Minneapolis, MN 55455 USA"]	Times Cited in Web of Science Core Collection: 34 Total Times Cited: 35 Cited Reference Count: 78	10.1073/pnas.1807190116 WE - Science Citation Index Expanded (SCI-EXPANDED) WE - Social Science Citation Index (SSCI)	citizen science;machine learning;human computing interaction;physical sciences;biological sciences;GALAXY ZOO;PARTICIPATION;Humanities;Humanism;Humans
CITIZEN SCIENCE IN ARCHAEOLOGY	2014	AMERICAN ANTIQUITY	["0002-7316", "2325-5064 J9 - AM ANTIQUITY JI - Am. Antiq."]	79	749-762	Smith, ML	Univ Calif Los Angeles, Dept Anthropol, Los Angeles, CA 90095 USA	Times Cited in Web of Science Core Collection: 35 Total Times Cited: 35 Cited Reference Count: 89	10.7183/0002-7316.79.4.749 WE - Social Science Citation Index (SSCI) WE - Arts &amp; Humanities Citation Index (A&amp;HCI)	SETI-AT-HOME;GEOGRAPHIC INFORMATION;COMMUNITY;CHILDREN;SENSORS;WORLD
CNN-Based Classifier as an Offline Trigger for the CREDO Experiment	2021	SENSORS	1424-8220 J9 - SENSORS-BASEL JI - Sensors	21		Piekarczyk, M and Bar, O and Bibrzycki, L and Niedzwiecki, M and Rzecki, K and Stuglik, S and Andersen, T and Budnev, NM and Alvarez-Castillo, DE and Cheminant, KA and Gora, D and Gupta, AC and Hnatyk, B and Homola, P and Kaminski, R and Kasztelan, M and Knap, M and Kovacs, P and Lozowski, B and Miszczyk, J and Mozgova, A and Nazari, V and Pawlik, M and Rosas, M and Sushchov, O and Smelcerz, K an…	["Pedag Univ Krakow, Inst Comp Sci, PL-30084 Krakow, Poland", "Cracow Univ Technol, Fac Comp Sci & Telecommun, PL-31155 Krakow, Poland", "AGH Univ Sci & Technol, Dept Biocybernet & Biomed Engn, PL-30059 Krakow, Poland", "Polish Acad Sci, Inst Nucl Phys, PL-31342 Krakow, Poland", "NSCIR, Thornbury, ON N0H2P0, Canada", "Irkutsk State Univ, Inst Appl Phys, Irkutsk 664003, Russia", "JINR, Bogoliubov …	Times Cited in Web of Science Core Collection: 4 Total Times Cited: 4 Cited Reference Count: 57	10.3390/s21144804 WE - Science Citation Index Expanded (SCI-EXPANDED)	image sensors;global sensor network;gamification;citizen science;convolutional neural networks;image classification;deep learning;CREDO;HEALTH
Combining Deep Learning and Location-Based Ranking for Large-Scale Archaeological Prospection of LiDAR Data from The Netherlands	2020	ISPRS INTERNATIONAL JOURNAL OF GEO-INFORMATION	2220-9964 J9 - ISPRS INT J GEO-INF JI - ISPRS Int. J. Geo-Inf.	9		Verschoof-van der Vaart, WB and Lambers, K and Kowalczyk, W and Bourgeois, QPJ	["Leiden Univ, Fac Archaeol, POB 9514, NL-2300 RA Leiden, Netherlands", "Leiden Univ, Data Sci Res Programme, Leiden Ctr Data Sci, POB 9505, NL-2300 RA Leiden, Netherlands", "Leiden Univ, Leiden Inst Adv Comp Sci, POB 9512, NL-2300 RA Leiden, Netherlands"]	Times Cited in Web of Science Core Collection: 28 Total Times Cited: 28 Cited Reference Count: 83	10.3390/ijgi9050293 WE - Science Citation Index Expanded (SCI-EXPANDED) WE - Social Science Citation Index (SSCI)	citizen science;Deep Learning;LiDAR;The Netherlands;Faster R-CNN;SATELLITE IMAGERY;REMAINS;QUALITY;MODELS;AD;Netherlands;Learning
Computer Algorithm for Archaeological Projectile Points Automatic Classification	2019	ACM JOURNAL ON COMPUTING AND CULTURAL HERITAGE	["1556-4673", "1556-4711 J9 - ACM J COMPUT CULT HE JI - ACM J. Comput. Cult. Herit."]	12		Flores, FC and Ugalde, FG and Diaz, JLP and Navarro, JZ and Gastelum-Strozzi, A and Angeles, MD and Miyatake, MN	["Univ Nacl Autonoma Mexico, Fac Ingn, Ave Univ 3000, Ciudad De Mexico 04510, DF, Mexico", "Inst Nacl Antropol E Hist, Archaeol, Madero 369 Col Ctr, Morelia 58000, Michoacan, Mexico", "Univ Nacl Autonoma Mexico, Ave Univ 3000, Ciudad De Mexico 04510, DF, Mexico", "Univ Nacl Autonoma Mexico, Inst Ciencias Aplicadas & Tecnol, Ave Univ 3000, Ciudad De Mexico 04510, DF, Mexico", "Inst Politecn Nacl, …	Times Cited in Web of Science Core Collection: 3 Total Times Cited: 3 Cited Reference Count: 54	10.1145/3300972 WE - Science Citation Index Expanded (SCI-EXPANDED) WE - Arts &amp; Humanities Citation Index (A&amp;HCI)	Projectile points;automatic classification;pattern recognition;image analysis;computer vision;CSS-map;lithic technology;GEOMETRIC MORPHOMETRIC-ANALYSIS;IMAGE;Algorithms
Correcting misclassification errors in crowdsourced ecological data: A Bayesian perspective	2021	JOURNAL OF THE ROYAL STATISTICAL SOCIETY SERIES C-APPLIED STATISTICS	["0035-9254", "1467-9876 J9 - J ROY STAT SOC C JI - J. R. Stat. Soc. Ser. C-Appl. Stat."]	70	147-173	Santos-Fernandez, E and Peterson, EE and Vercelloni, J and Rushworth, E and Mengersen, K	["Queensland Univ Technol, Sch Math Sci, Brisbane, Qld, Australia", "Australian Res Council, Ctr Excellence Math & Stat Frontiers ACEMS, Melbourne, Vic, Australia"]	Times Cited in Web of Science Core Collection: 3 Total Times Cited: 3 Cited Reference Count: 90	10.1111/rssc.12453	Bayesian model;beta regression;corals;ecology;image classification;misclassification error;monitoring;spatial model;participants&#8217;performance measures;the Great Barrier Reef;CITIZEN SCIENCE DATA;SPATIAL AUTOCORRELATION;AUTOREGRESSIVE MODELS;PRESENCE-ABSENCE;BETA REGRESSION;CORAL;REEF;REEVALUATION;INFERENCE;ABUNDANCE
Crowds Replicate Performance of Scientific Experts Scoring Phylogenetic Matrices of Phenotypes	2018	SYSTEMATIC BIOLOGY	["1063-5157", "1076-836X J9 - SYST BIOL JI - Syst. Biol."]	67	49-60	O'Leary, MA and Alphonse, K and Mariangeles, AH and Cavaliere, D and Cirranello, A and Dietterich, TG and Julius, M and Kaufman, S and Law, E and Passarotti, M and Reft, A and Robalino, J and Simmons, NB and Smith, SY and Stevenson, DW and Theriot, ED and Velazco, PM and Walls, RL and Yu, MJ and Daly, M	["SUNY Stony Brook, Dept Anat Sci, HSC T-8 040, Stony Brook, NY 11794 USA", "Kenx Technol Inc, 1170 N Milwaukee Ave, Chicago, IL 60642 USA", "Drexel Univ, Dept Ichthyol, Acad Nat Sci, 1900 Benjamin Franklin Pkwy, Philadelphia, PA 19103 USA", "New York Bot Garden, 2900 Southern Blvd, Bronx, NY 10458 USA", "Amer Museum Nat Hist, Dept Mammal, 79th St & Cent Pk West, New York, NY 10024 USA", "Oregon …	Times Cited in Web of Science Core Collection: 5 Total Times Cited: 5 Cited Reference Count: 32	10.1093/sysbio/syx052 WE - Science Citation Index Expanded (SCI-EXPANDED)	Citizen science;crowdsourcing;MorphoBank;morphology;phenomics;phylogenetics;Phenotype;Crowding
Deep learning identification for citizen science surveillance of tiger mosquitoes	2021	SCIENTIFIC REPORTS	2045-2322 J9 - SCI REP-UK JI - Sci Rep	11		Pataki, BA and Garriga, J and Eritja, R and Palmer, JRB and Bartumeus, F and Csabai, I	["Eotvos Lorand Univ, Dept Phys Complex Syst, Budapest, Hungary", "Ctr Estudis Avancats Blanes CEAB CSIC, Girona 17300, Spain", "CREAF, Cerdanyola Del Valles 08193, Spain", "Univ Pompeu Fabra, Barcelona 08005, Spain", "Inst Catalana Recerca & Estudis Avancats ICREA, Barcelona 08010, Spain"]	Times Cited in Web of Science Core Collection: 12 Total Times Cited: 12 Cited Reference Count: 49	10.1038/s41598-021-83657-4 WE - Science Citation Index Expanded (SCI-EXPANDED)	VIRUS;Culicidae
Deep learning increases the availability of organism photographs taken by citizens in citizen science programs	2022	SCIENTIFIC REPORTS	2045-2322 J9 - SCI REP-UK JI - Sci Rep	12		Suzuki-Ohno, Y and Westfechtel, T and Yokoyama, J and Ohno, K and Nakashizuka, T and Kawata, M and Okatani, T	["Tohoku Univ, Grad Sch Life Sci, Aoba Ku, 6-3 Aoba, Sendai, Miyagi 9808578, Japan", "Tohoku Univ, Dept Syst Informat Sci, Grad Sch Informat Sci, Aoba Ku, 6-6-01 Aoba, Sendai, Miyagi 9808578, Japan", "Yamagata Univ, Fac Sci, 1-4-12 Kojirakawa, Yamagata, Yamagata 9908560, Japan", "Tohoku Univ, New Ind Creat Hatchery Ctr, Aoba Ku, 468-1 Aoba, Sendai, Miyagi 9800845, Japan", "Res Inst Humanity & Nat…	Times Cited in Web of Science Core Collection: 1 Total Times Cited: 1 Cited Reference Count: 28	10.1038/s41598-022-05163-5 WE - Science Citation Index Expanded (SCI-EXPANDED)	COLOR PATTERNS;IDENTIFICATION;EVOLUTION;ACCURACY
Digital Support for Archaeology	2009	INTERDISCIPLINARY SCIENCE REVIEWS	["0308-0188", "1743-2790 J9 - INTERDISCIPL SCI REV JI - Interdiscip. Sci. Rev."]	34	189-205	Boon, P and Van der Maaten, L and Paijmans, H and Postma, E and Lange, G	["Tilburg Univ, Fac Humanities, Tilburg Ctr Creat Comp, TiCC, NL-5000 LE Tilburg, Netherlands", "Dutch State Serv Archaeol Built Monuments & Cultu, Amersfoort, Netherlands"]	Times Cited in Web of Science Core Collection: 2 Total Times Cited: 2 Cited Reference Count: 18	10.1179/174327909X441108 WE - Science Citation Index Expanded (SCI-EXPANDED) WE - Social Science Citation Index (SSCI) WE - Arts &amp; Humanities Citation Index (A&amp;HCI)	Archaeology;Digitization;Information retrieval;Visualization;Artificial intelligence
Digital taxonomist: Identifying plant species in community scientists' photographs	2021	ISPRS JOURNAL OF PHOTOGRAMMETRY AND REMOTE SENSING	["0924-2716", "1872-8235 J9 - ISPRS J PHOTOGRAMM JI - ISPRS-J. Photogramm. Remote Sens."]	182	112-121	de Lutio, R and She, YH and D'Aronco, S and Russo, S and Brun, P and Wegner, JD and Schindler, K	["Swiss Fed Inst Technol, Photogrammetry & Remote Sensing, EcoVis Lab, Zurich, Switzerland", "WSL, Dynam Macroecol, Land Change Sci, Zurich, Switzerland", "Univ Zurich, Inst Computat Sci, Zurich, Switzerland"]	Times Cited in Web of Science Core Collection: 2 Total Times Cited: 2 Cited Reference Count: 29	10.1016/j.isprsjprs.2021.10.002	Species recognition;Community science;Hierarchical classification;Multimodal learning
Digital Zooarchaeology: State of the art, challenges, prospects and synergies	2022	JOURNAL OF ARCHAEOLOGICAL SCIENCE-REPORTS	2352-409X J9 - J ARCHAEOL SCI-REP JI - J. Archaeol. Sci.-Rep.	45		Spyrou, A and Nobles, G and Hadjikoumis, A and Evin, A and Hulme-Beaman, A and Cakirlar, C and Ameen, C and Loucas, N and Nikita, E and Hanot, P and de Boer, NM and Avgousti, A and Zohar, I and May, H and Rehren, T	["Sci & Technol Archaeol & Culture Res Ctr STARC, Cyprus Inst, Nicosia, Cyprus", "Dept Geomat, Oxford Archaeol, Oxford, England", "Inst Sci Evolut Montpellier, Montpellier, France", "Univ Liverpool, Dept Vet Anat Physiol & Pathol, Liverpool, Merseyside, England", "Univ Groningen, Groningen Inst Archaeol GIA, Groningen, Netherlands", "Univ Exeter, Dept Archaeol, Exeter, Devon, England", "Museum Na…	Times Cited in Web of Science Core Collection: 0 Total Times Cited: 0 Cited Reference Count: 100	10.1016/j.jasrep.2022.103588	Zooarchaeology;Reference Collections;Digital Archaeology;Digital Twin;3D modeling;Linked Open Data;Citizen Science;MICRO-COMPUTED TOMOGRAPHY;GEOMETRIC MORPHOMETRICS;VIRTUAL RECONSTRUCTION;SEXUAL-DIMORPHISM;ARCHAEOLOGY;REMAINS;SHAPE;PHOTOGRAMMETRY;EVOLUTIONARY;CYPRINIDAE
eBird: A Human/Computer Learning Network to Improve Biodiversity Conservation and Research	2013	AI MAGAZINE	["0738-4602", "2371-9621 J9 - AI MAG JI - AI Mag."]	34	10-20 WE - Science Citation Index Expanded (SCI-EXPANDED)	Kelling, S and Lagoze, C and Wong, WK and Yu, J and Damoulas, T and Gerbracht, J and Fink, D and Gomes, C	["Cornell Lab Ornithol, Ithaca, NY 14850 USA", "Univ Michigan, Sch Informat, Ann Arbor, MI 48109 USA", "Oregon State Univ, Corvallis, OR 97331 USA", "Cornell Univ, Dept Comp Sci, Ithaca, NY 14853 USA", "Cornell Univ, Inst Computat Sustainabil, Ithaca, NY 14853 USA"]	Times Cited in Web of Science Core Collection: 31 Total Times Cited: 32 Cited Reference Count: 17		BIRD;Humanities;Humanism;Humans
Flora Capture: a citizen science application for collecting structured plant observations	2020	BMC BIOINFORMATICS	1471-2105 J9 - BMC BIOINFORMATICS JI - BMC Bioinformatics	21		Boho, D and Rzanny, M and Waldchen, J and Nitsche, F and Deggelmann, A and Wittich, HC and Seeland, M and Mader, P	["Tech Univ Ilmenau, Inst Comp & Syst Engn, Helmholtzpl 5, D-98693 Ilmenau, Germany", "Max Planck Inst Biogeochem, Dept Biogeochem Integrat, Hans Knoll Str 10, D-07745 Jena, Germany"]	Times Cited in Web of Science Core Collection: 10 Total Times Cited: 10 Cited Reference Count: 30	10.1186/s12859-020-03920-9 WE - Science Citation Index Expanded (SCI-EXPANDED)	Structured plant observations;Multi-organ plant identification;Mobile app;Citizen science;Digital plant collection;Digital herbariumn
Fossil Atmospheres: a case study of citizen science in question-driven palaeontological research	2019	PHILOSOPHICAL TRANSACTIONS OF THE ROYAL SOCIETY B-BIOLOGICAL SCIENCES	["0962-8436", "1471-2970 J9 - PHILOS T R SOC B JI - Philos. Trans. R. Soc. B-Biol. Sci."]	374		Soul, LC and Barclay, RS and Bolton, A and Wing, SL	["Natl Museum Nat Hist, Dept Paleobiol, Smithsonian Inst, 10th & Constitut Ave NW, Washington, DC 20560 USA", "Natl Museum Nat Hist, Dept Educ & Outreach, Smithsonian Inst, 10th & Constitut Ave NW, Washington, DC 20560 USA"]	Times Cited in Web of Science Core Collection: 2 Total Times Cited: 2 Cited Reference Count: 40	10.1098/rstb.2017.0388 WE - Science Citation Index Expanded (SCI-EXPANDED) WE - Social Science Citation Index (SSCI)	Ginkgo biloba;carbon dioxide;Zooniverse;palaeoclimate;citizen science;CARBON-CYCLE;CO2;CLIMATE;Fossils
Fossil brachiopod identification using a new deep convolutional neural network	2022	GONDWANA RESEARCH	["1342-937X", "1878-0571 J9 - GONDWANA RES JI - Gondwana Res."]	105	290-298	Wang, HZ and Li, CF and Zhang, ZF and Kershaw, S and Holmer, LE and Zhang, Y and Wei, KY and Liu, P	["China Univ Petr, State Key Lab Petr Resources & Prospecting, Beijing 102249, Peoples R China", "China Univ Petr, Coll Geosci, Beijing 102249, Peoples R China", "Beijing Univ Posts & Telecommun, Sch Sci, Beijing 100876, Peoples R China", "Northwest Univ, Dept Geol, State Key Lab Continental Dynam, Shaanxi Key Lab Early Life & Environm, Xian 710069, Peoples R China", "Brunel Univ, Inst Environm &…	Times Cited in Web of Science Core Collection: 3 Total Times Cited: 3 Cited Reference Count: 28	10.1016/j.gr.2021.09.011	Fossil identification;Brachiopods;Deep learning;Convolution Neural Network;Transpose Convolutional Neural Network;Nerve Net;Neural Networks (Computer);Fossils
Handling uncertainty in citizen science data: Towards an improved amateur-based large-scale classification	2019	INFORMATION SCIENCES	["0020-0255", "1872-6291 J9 - INFORM SCIENCES JI - Inf. Sci."]	479	301-320	Jimenez, M and Triguero, I and John, R	Univ Nottingham, Sch Comp Sci, Automated Scheduling Optimisat & Planning Res Grp, Nottingham NG8 1BB, England	Times Cited in Web of Science Core Collection: 14 Total Times Cited: 14 Cited Reference Count: 50	10.1016/j.ins.2018.12.011 WE - Science Citation Index Expanded (SCI-EXPANDED)	Citizen science;Classification;Astroinformatics;Galaxy morphologies;Uncertainty;Data analysis;DECISION-MAKING PROBLEMS;GALAXY ZOO;MULTICRITERIA;MORPHOLOGIES;PERFORMANCE;VOLUNTEERS;PREFERENCE;TOOL
How citizen scientists contribute to monitor protected areas thanks to automatic plant identification tools	2020	ECOLOGICAL SOLUTIONS AND EVIDENCE	2688-8319 J9 - ECOL SOLUT EVID JI - Ecol. Solut. Evid.	1		Bonnet, P and Joly, A and Faton, JM and Brown, S and Kimiti, D and Deneu, B and Servajean, M and Affouard, A and Lombardo, JC and Mary, L and Vignau, C and Munoz, F	["CIRAD, UMR AMAP, F-34398 Montpellier, Occitanie, France", "Univ Montpellier, CNRS, AMAP, CIRAD,INRAE,IRD, Montpellier, Occitanie, France", "ZENITH Team, INRIA Sophia Antipolis, UMR 5506, LIRMM,CC 477, Montpellier, Occitanie, France", "Reserve Nat Natl Ramieres Val Drome, Allex, France", "Lewa House Pimbi Ltd, Isiolo, Kenya", "Lewa Wildlife Conservancy, Isiolo, Kenya", "Univ Montpellier, CNRS, U…	Times Cited in Web of Science Core Collection: 13 Total Times Cited: 13 Cited Reference Count: 33	10.1002/2688-8319.12023 WE - Emerging Sources Citation Index (ESCI)	artificial intelligence;automatic plant identification;citizen science;deep learning technologies;opportunistic data;plant biodiversity monitoring;public engagement;volunteers;intelligence artificielle;identification automatique des plantes;science citoyenne;technologies d'apprentissage profond;donnees opportunistes;surveillance de la biodiversite vegetale;engagement du public;volontaires;SCIENCE…
Human-machine-learning integration and task allocation in citizen science	2022	HUMANITIES & SOCIAL SCIENCES COMMUNICATIONS	2662-9992 J9 - HUM SOC SCI COMMUN JI - Hum. Soc. Sci. Commun.	9		Ponti, M and Seredko, A	Univ Gothenburg, Gothenburg, Sweden	Times Cited in Web of Science Core Collection: 2 Total Times Cited: 2 Cited Reference Count: 87	10.1057/s41599-022-01049-z WE - Social Science Citation Index (SSCI) WE - Arts &amp; Humanities Citation Index (A&amp;HCI)	CLASSIFICATION;MODELS;Humanities;Humanism;Humans
Innovations in Camera Trapping Technology and Approaches: The Integration of Citizen Science and Artificial Intelligence	2020	ANIMALS	2076-2615 J9 - ANIMALS-BASEL JI - Animals	10		Green, SE and Rees, JP and Stephens, PA and Hill, RA and Giordano, AJ	["Univ Durham, Dept Anthropol, Durham DH1 3LE, England", "Univ Durham, Conservat Ecol Grp, Dept Biosci, Durham DH1 3LE, England", "SPECIES, Ventura, CA 93006 USA"]	Times Cited in Web of Science Core Collection: 26 Total Times Cited: 27 Cited Reference Count: 92	10.3390/ani10010132 WE - Science Citation Index Expanded (SCI-EXPANDED) WE - Social Science Citation Index (SSCI)	camera trapping;citizen science;artificial intelligence;engagement;camera traps;public awareness;data processing;conservation technology;CONSERVATION;BIODIVERSITY;MOTIVATIONS;SCIENTISTS;BEHAVIOR;NETWORK;TRAPS;EXTINCTION;EXPERIENCE;ATTITUDES;Intelligence
Integrating Remote Sensing, Machine Learning, and Citizen Science in Dutch Archaeological Prospection	2019	REMOTE SENSING	2072-4292 J9 - REMOTE SENS-BASEL JI - Remote Sens.	11		Lambers, K and Verschoof-van der Vaart, WB and Bourgeois, QPJ	["Leiden Univ, Fac Archaeol, POB 9514, NL-2300 RA Leiden, Netherlands", "Leiden Univ, Leiden Ctr Data Sci, Data Sci Res Programme, POB 9505, NL-2300 RA Leiden, Netherlands"]	Times Cited in Web of Science Core Collection: 68 Total Times Cited: 68 Cited Reference Count: 103	10.3390/rs11070794 WE - Science Citation Index Expanded (SCI-EXPANDED) WE - Social Science Citation Index (SSCI)	airborne laser scanning;archaeological prospection;deep learning;citizen science;The Netherlands;AUTOMATIC DETECTION;FEATURE-EXTRACTION;AIRBORNE;SETTLEMENT;LIDAR;PATTERNS;FEATURES;IMAGERY;OBJECT;Learning
Interactive annotation of geometric ornamentation on painted pottery assisted by deep learning	2022	IT-INFORMATION TECHNOLOGY	["1611-2776", "2196-7032 J9 - IT-INF TECHNOL JI - IT-Inf. Technol."]	64	217-231	Lengauer, S and Houska, P and Preiner, R and Trinkl, E and Karl, S and Sipiran, I and Bustos, B and Schreck, T	["Graz Univ Technol, Inst Comp Graph & Knowledge Visualizat, Inffeldgasse 16c, A-8010 Graz, Austria", "Karl Franzens Univ Graz, Inst Class, Univ Pl 3, A-8010 Graz, Austria", "Univ Chile, Dept Comp Sci, Beauchef 851 3er Piso, Santiago, Chile"]	Times Cited in Web of Science Core Collection: 0 Total Times Cited: 0 Cited Reference Count: 31	10.1515/itit-2022-0007	Painted pottery;ornament detection and classification;ornamentation benchmark;evaluation;visual clustering;Learning
Knowledge Tracing to Model Learning in Online Citizen Science Projects	2020	IEEE TRANSACTIONS ON LEARNING TECHNOLOGIES	1939-1382 J9 - IEEE T LEARN TECHNOL JI - IEEE Trans. Learn. Technol.	13	123-134	Crowston, K and Osterlund, C and Lee, TK and Jackson, C and Harandi, M and Allen, S and Bahaadini, S and Coughlin, S and Katsaggelos, AK and Larson, SL and Rohani, N and Smith, JR and Trouille, L and Zevin, M	["Syracuse Univ, Sch Informat Studies, Syracuse, NY 13244 USA", "Univ Utah, Dept Commun, Salt Lake City, UT 84112 USA", "Univ Calif Berkeley, Berkeley, CA 94720 USA", "Adler Planetarium, Chicago, IL 60605 USA", "Northwestern Univ, Dept Elect Engn & Comp Sci, Evanston, IL USA", "Northwestern Univ, Dept Phys & Astron, CIERA, Evanston, IL 60208 USA", "Calif State Univ Fullerton, Dept Phys, Fullerton…	Times Cited in Web of Science Core Collection: 5 Total Times Cited: 5 Cited Reference Count: 19	10.1109/TLT.2019.2936480 WE - Science Citation Index Expanded (SCI-EXPANDED) WE - Social Science Citation Index (SSCI)	Training;Task analysis;Gravity;Machine learning;Data models;Bayes methods;Classification algorithms;Citizen science;machine learning;training
Leveraging Pattern Recognition Consistency Estimation for Crowdsourcing Data Analysis	2016	IEEE TRANSACTIONS ON HUMAN-MACHINE SYSTEMS	["2168-2291", "2168-2305 J9 - IEEE T HUM-MACH SYST JI - IEEE T. Hum.-Mach. Syst."]	46	474-480	Shamir, L and Diamond, D and Wallin, J	["Lawrence Technol Univ, Dept Comp Sci, Southfield, MI 48075 USA", "Middle Tennessee State Univ, Dept Phys & Astron, Murfreesboro, TN 37130 USA"]	Times Cited in Web of Science Core Collection: 12 Total Times Cited: 15 Cited Reference Count: 49	10.1109/THMS.2015.2463082 WE - Science Citation Index Expanded (SCI-EXPANDED)	Big data;citizen science;crowdsourcing;data analysis;CITIZEN SCIENCE;TEXTURAL FEATURES;COMPUTER-ANALYSIS;GALAXY ZOO;CLASSIFICATION;TOOL;SIMILARITIES;Statistics as Topic
Limitations of Majority Agreement in Crowdsourced Image Interpretation	2017	TRANSACTIONS IN GIS	["1361-1682", "1467-9671 J9 - T GIS JI - Trans. GIS"]	21	207-223	Salk, CF and Sturn, T and See, L and Fritz, S	["Int Inst Appl Syst Anal, Laxenburg, Austria", "Swedish Univ Agr Sci, Alnarp, Sweden"]	Times Cited in Web of Science Core Collection: 13 Total Times Cited: 13 Cited Reference Count: 33	10.1111/tgis.12194 WE - Social Science Citation Index (SSCI)	CITIZEN SCIENCE;QUALITY
Machine Learning Arrives in Archaeology	2021	ADVANCES IN ARCHAEOLOGICAL PRACTICE	2326-3768 J9 - ADV ARCHAEOL PRACT JI - Adv. Archaeol. Pract.	9	186-191	Bickler, SH	Bickler Consultants Ltd, 1-623 Manukau Rd, Auckland 1023, New Zealand PU - CAMBRIDGE UNIV PRESS PI - NEW YORK PA - 32 AVENUE OF THE AMERICAS, NEW YORK, NY 10013-2473 USA	Times Cited in Web of Science Core Collection: 21 Total Times Cited: 21 Cited Reference Count: 57	10.1017/aap.2021.6 WE - Arts &amp; Humanities Citation Index (A&amp;HCI)	machine learning;transfer learning;heritage management;classification;neural networks;NEURAL-NETWORKS;CLASSIFICATION;RECOGNITION;PROSPECTION;POTTERY;Learning
Machine Learning for Cultural Heritage: A Survey	2020	PATTERN RECOGNITION LETTERS	["0167-8655", "1872-7344 J9 - PATTERN RECOGN LETT JI - Pattern Recognit. Lett."]	133	102-108	Fiorucci, M and Khoroshiltseva, M and Pontil, M and Traviglia, A and Del Bue, A and James, S	["Ist Italiano Tecnol IIT, Ctr Cultural Heritage Technol CCHT, Genoa, Italy", "Ist Italiano Tecnol IIT, Computat Stat & Machine Learning, Genoa, Italy", "Ist Italiano Tecnol IIT, Visual Geometry & Modelling VGM Lab, Genoa, Italy"]	Times Cited in Web of Science Core Collection: 72 Total Times Cited: 73 Cited Reference Count: 56	10.1016/j.patrec.2020.02.017 WE - Science Citation Index Expanded (SCI-EXPANDED) WE - Social Science Citation Index (SSCI)	Artificial Intelligence;Machine Learning;Cultural Heritage;Digital Humanities;ARCHAEOLOGICAL SITE;CLASSIFICATION;RECOGNITION;REGRESSION
Mask R-CNN-Oriented Pottery Display and Identification System	2022	COMPUTATIONAL INTELLIGENCE AND NEUROSCIENCE	["1687-5265", "1687-5273 J9 - COMPUT INTEL NEUROSC JI - Comput. Intell. Neurosci."]	2022		Wei, CT	Hubei Acad Fine Arts, Wuhan 430205, Hubei, Peoples R China PU - HINDAWI LTD PI - LONDON PA - ADAM HOUSE, 3RD FLR, 1 FITZROY SQ, LONDON, W1T 5HF, ENGLAND	Times Cited in Web of Science Core Collection: 0 Total Times Cited: 0 Cited Reference Count: 34	10.1155/2022/6288201 WE - Science Citation Index Expanded (SCI-EXPANDED)	CLASSIFICATION
Maximizing citizen scientists' contribution to automated species recognition	2022	SCIENTIFIC REPORTS	2045-2322 J9 - SCI REP-UK JI - Sci Rep	12		Koch, W and Hogeweg, L and Nilsen, EB and Finstad, AG	["Norwegian Univ Sci & Technol, Dept Nat Hist, Trondheim, Norway", "Norwegian Biodivers Informat Ctr, Trondheim, Norway", "Intel Benelux, High Tech Campus 83, NL-5656 AE Eindhoven, Netherlands", "Nat Biodivers Ctr, POB 9517, NL-2300 RA Leiden, Netherlands", "Nord Univ, Fac Biosci & Aquaculture, Steinkjer, Norway"]	Times Cited in Web of Science Core Collection: 0 Total Times Cited: 0 Cited Reference Count: 41	10.1038/s41598-022-11257-x WE - Science Citation Index Expanded (SCI-EXPANDED)	SCIENCE
Maximizing human effort for analyzing scientific images: A case study using digitized herbarium sheets	2020	APPLICATIONS IN PLANT SCIENCES	2168-0450 J9 - APPL PLANT SCI JI - Appl. Plant Sci.	8		Brenskelle, L and Guralnick, RP and Denslow, M and Stucky, BJ	["Univ Florida, Florida Museum Nat Hist, Gainesville, FL 32611 USA", "Univ Florida, Dept Biol, Gainesville, FL 32611 USA"]	Times Cited in Web of Science Core Collection: 4 Total Times Cited: 4 Cited Reference Count: 19	10.1002/aps3.11370 WE - Science Citation Index Expanded (SCI-EXPANDED)	citizen science;herbarium specimens;image annotation;machine learning;phenology;specimen images;Humans;Humanities;Humanism
Measuring agreement among experts in classifying camera images of similar species	2018	ECOLOGY AND EVOLUTION	2045-7758 J9 - ECOL EVOL JI - Ecol. Evol.	8	11009-11021	Gooliaff, TJ and Hodges, KE	Univ British Columbia Okanagan, Dept Biol, Kelowna, BC, Canada	Times Cited in Web of Science Core Collection: 12 Total Times Cited: 12 Cited Reference Count: 45	10.1002/ece3.4567 WE - Science Citation Index Expanded (SCI-EXPANDED)	bobcat;Canada lynx;expert identification;image classification;Lynx canadensis;Lynx rufus;CAPTURE-RECAPTURE;CONSERVATION;TRAPS;MANAGEMENT;OCCUPANCY;MODELS
Narratives of epistemic agency in citizen science classification projects: ideals of science and roles of citizens	2022	AI & SOCIETY	["0951-5666", "1435-5655 J9 - AI SOC JI - AI Soc."]			Ponti, M and Kasperowski, D and Gander, AJ	["Univ Gothenburg, Dept Appl Informat Technol, Gothenburg, Sweden", "Univ Gothenburg, Dept Philosophy Linguist & Theory Sci, Gothenburg, Sweden"]	Times Cited in Web of Science Core Collection: 0 Total Times Cited: 0 Cited Reference Count: 81	10.1007/s00146-022-01428-9	Citizen science;Classification;Human-machine integration;Machine learning;Narratives;Task allocation;KNOWLEDGE;MOTIVATIONS;EXPERTISE;IMPROVE;END
On the impact of Citizen Science-derived data quality on deep learning based classification in marine images	2019	PLOS ONE	1932-6203 J9 - PLOS ONE JI - PLoS One	14		Langenkamper, D and Simon-Lledo, E and Hosking, B and Jones, DOB and Nattkemper, TW	["Bielefeld Univ, Fac Technol, Biodata Min Grp, Bielefeld, Germany", "Univ Southampton, Natl Oceanog Ctr, Waterfront Campus, Southampton, Hants, England"]	Times Cited in Web of Science Core Collection: 15 Total Times Cited: 15 Cited Reference Count: 20	10.1371/journal.pone.0218086 WE - Science Citation Index Expanded (SCI-EXPANDED)	Research Design;Military Personnel
Recognizability bias in citizen science photographs	2023	ROYAL SOCIETY OPEN SCIENCE	2054-5703 J9 - ROY SOC OPEN SCI JI - R. Soc. Open Sci.	10		Koch, W and Hogeweg, L and Nilsen, EB and O'Hara, RB and Finstad, AG	["Norwegian Univ Sci & Technol, Dept Nat Hist, N-7491 Trondheim, Norway", "Norwegian Univ Sci & Technol, Dept Math Sci, N-7491 Trondheim, Norway", "Norwegian Biodivers Informat Ctr, Havnegata 9, N-7010 Trondheim, Norway", "Intel Benelux, High Tech Campus 83, NL-5656 AE Eindhoven, Netherlands", "Nat Biodivers Ctr, POB 9517, NL-2300 RA Leiden, Netherlands", "Norwegian Inst Nat Res, Postboks 5685 To…	Times Cited in Web of Science Core Collection: 0 Total Times Cited: 0 Cited Reference Count: 35	10.1098/rsos.221063 WE - Science Citation Index Expanded (SCI-EXPANDED)	citizen science;image recognition;machine learning;recognizability;Bias (Epidemiology)
Smartphone Icon User Interface design for non-literate trackers and its implications for an inclusive citizen science	2017	BIOLOGICAL CONSERVATION	["0006-3207", "1873-2917 J9 - BIOL CONSERV JI - Biol. Conserv."]	208	155-162	Liebenberg, L and Steventon, J and Brahman, I and Benadie, K and Minye, J and Langwane, H and Xhukwe, Q	["Harvard Univ, Human Evolutionary Biol, Cambridge, MA 02138 USA", "CyberTracker Conservat, POB 1211, ZA-7985 Cape Town, South Africa", "Microsoft, 1010 State St, Kirkland, WA 98033 USA"]	Times Cited in Web of Science Core Collection: 39 Total Times Cited: 39 Cited Reference Count: 77	10.1016/j.biocon.2016.04.033 WE - Science Citation Index Expanded (SCI-EXPANDED) WE - Social Science Citation Index (SSCI)	Smartphone Icon User Interface;Citizen science;Tracking;CyberTracker;BIOLOGICAL RECORDS CENTER;NATIONAL-PARK;NORTHERN AUSTRALIA;BLACK RHINOS;CONSERVATION;ECOLOGY;MANAGEMENT;PROFESSIONALS;BIODIVERSITY;ARCHAEOLOGY
Statistical solutions for error and bias in global citizen science datasets	2014	BIOLOGICAL CONSERVATION	["0006-3207", "1873-2917 J9 - BIOL CONSERV JI - Biol. Conserv."]	173	144-154	Bird, TJ and Bates, AE and Lefcheck, JS and Hill, NA and Thomson, RJ and Edgar, GJ and Stuart-Smith, RD and Wotherspoon, S and Krkosek, M and Stuart-Smith, JF and Pecl, GT and Barrett, N and Frusher, S	["Univ Melbourne, Sch Bot, Parkville, Vic 3010, Australia", "Univ Tasmania, Inst Marine & Antarctic Studies, Hobart, Tas 7001, Australia", "Virginia Inst Marine Sci, Coll William & Mary, Gloucester Point, VA 23062 USA", "Univ Toronto, Ramsay Wright Zool Labs, Dept Ecol & Evolutionary Biol, Toronto, ON M5S 3G5, Canada"]	Times Cited in Web of Science Core Collection: 284 Total Times Cited: 287 Cited Reference Count: 87	10.1016/j.biocon.2013.07.037 WE - Science Citation Index Expanded (SCI-EXPANDED)	Volunteer data;Statistical analysis;Experimental design;Linear models;Additive models;Species distribution models;Biodiversity;Reef life survey;SPECIES DISTRIBUTIONS;DISTRIBUTION MODELS;DIVERSITY;BIODIVERSITY;REGRESSION;ABUNDANCE;CONSEQUENCES;RELIABILITY;VOLUNTEERS;PREDICTION;Bias (Epidemiology)
The automatic recognition of ceramics from only one photo: The ArchAIDE app	2021	JOURNAL OF ARCHAEOLOGICAL SCIENCE-REPORTS	2352-409X J9 - J ARCHAEOL SCI-REP JI - J. Archaeol. Sci.-Rep.	36		Anichini, F and Dershowitz, N and Dubbini, N and Gattiglia, G and Itkin, B and Wolf, L	["Univ Pisa, MAPPA Lab, Via Mille 19, I-56126 Pisa, Italy", "Tel Aviv Univ, Sch Comp Sci, Ramat Aviv, Israel"]	Times Cited in Web of Science Core Collection: 7 Total Times Cited: 7 Cited Reference Count: 22	10.1016/j.jasrep.2020.102788	Ceramic identification;Models;Data;Augmentation
The Flora Incognita app - Interactive plant species identification	2021	METHODS IN ECOLOGY AND EVOLUTION	["2041-210X", "2041-2096 J9 - METHODS ECOL EVOL JI - Methods Ecol. Evol."]	12	1335-1342	Mader, P and Boho, D and Rzanny, M and Seeland, M and Wittich, HC and Deggelmann, A and Waldchen, J	["Tech Univ Ilmenau, Comp & Syst Engn Inst, Ilmenau, Germany", "Max Planck Inst Biogeochem, Jena, Germany"]	Times Cited in Web of Science Core Collection: 20 Total Times Cited: 20 Cited Reference Count: 37	10.1111/2041-210X.13611	automated plant species identification;biodiversity monitoring;citizen science;deep learning;environmental educational;machine learning;mobile app
The Partnership of Citizen Science and Machine Learning: Benefits, Risks, and Future Challenges for Engagement, Data Collection, and Data Quality	2021	SUSTAINABILITY	2071-1050 J9 - SUSTAINABILITY-BASEL JI - Sustainability	13		Lotfian, M and Ingensand, J and Brovelli, MA	["Univ Appl Sci & Arts Western Switzerland, Sch Business & Engn Vaud, Inst INSIT, CH-1400 Yverdon, Switzerland", "Politecn Milan, Dept Civil & Environm Engn, Piazza Leonardo da Vinci 32, I-20133 Milan, Italy"]	Times Cited in Web of Science Core Collection: 5 Total Times Cited: 6 Cited Reference Count: 77	10.3390/su13148087 WE - Science Citation Index Expanded (SCI-EXPANDED) WE - Social Science Citation Index (SSCI)	citizen science;machine learning;big data;artificial intelligence;task automation;engagement;data validation;Research Design
The Portable Antiquities of the Netherlands A Review	2022	ADVANCES IN ARCHAEOLOGICAL PRACTICE	2326-3768 J9 - ADV ARCHAEOL PRACT JI - Adv. Archaeol. Pract.	10	347-353	Carpentier, F	Katholieke Univ Leuven, Dept Archaeol, Leuven, Belgium	Times Cited in Web of Science Core Collection: 0 Total Times Cited: 0 Cited Reference Count: 16	10.1017/aap.2022.25	crowdsourcing;citizen science;documentation;Netherlands;portable antiquities
The Role of Citizen Science and Deep Learning in Camera Trapping	2021	SUSTAINABILITY	2071-1050 J9 - SUSTAINABILITY-BASEL JI - Sustainability	13		Adam, M and Tomasek, P and Lehejcek, J and Trojan, J and Junek, T	["Tomas Bata Univ Zlin, Fac Logist & Crisis Management, Uherske Hradiste 68601, Czech Republic", "Czech Acad Sci, Inst Geon, Dept Environm Geog, Brno 60200, Czech Republic", "Czech Univ Life Sci Prague, Fac Environm Sci, Prague 16500, Czech Republic"]	Times Cited in Web of Science Core Collection: 2 Total Times Cited: 2 Cited Reference Count: 50	10.3390/su131810287 WE - Science Citation Index Expanded (SCI-EXPANDED) WE - Social Science Citation Index (SSCI)	artificial intelligence;crowdsourcing;environmental monitoring;conceptual framework;wildlife;FUTURE;MANAGEMENT;SOFTWARE
Thinking like a naturalist: Enhancing computer vision of citizen science images by harnessing contextual data	2020	METHODS IN ECOLOGY AND EVOLUTION	["2041-210X", "2041-2096 J9 - METHODS ECOL EVOL JI - Methods Ecol. Evol."]	11	303-315	Terry, JCD and Roy, HE and August, TA	["NERC Ctr Ecol & Hydrol, Wallingford, Oxon, England", "Univ Oxford, Dept Zool, Oxford, England"]	Times Cited in Web of Science Core Collection: 33 Total Times Cited: 34 Cited Reference Count: 48	10.1111/2041-210X.13335	citizen science;computer vision;convolutional neural network;ladybird;machine learning;metadata;naturalists;species identification;LADYBIRD;Thinking
Transdisciplinary Archaeology and the Future of Archaeological Practice: Citizen Science, Portable Science, Ethical Science	2018	NORWEGIAN ARCHAEOLOGICAL REVIEW	["0029-3652", "1502-7678 J9 - NOR ARCHAEOL REV JI - Nor. Archaeol. Rev."]	51	36-47	Milek, K	Univ Durham, Dept Archaeol, Durham, England	Times Cited in Web of Science Core Collection: 13 Total Times Cited: 13 Cited Reference Count: 47	10.1080/00293652.2018.1552312 WE - Arts &amp; Humanities Citation Index (A&amp;HCI)	COLLABORATIVE ARCHAEOLOGY
Unsupervised clustering of Roman potsherds via Variational Autoencoders	2022	JOURNAL OF ARCHAEOLOGICAL SCIENCE	["0305-4403", "1095-9238 J9 - J ARCHAEOL SCI JI - J. Archaeol. Sci."]	142		Parisotto, S and Leone, N and Schonlieb, CB and Launaro, A	["Univ Cambridge, Dept Appl Math & Theoret Phys, Wilberforce Rd, Cambridge CB3 0WA, Cambridgeshire, England", "Univ Cambridge, Fac Class, Sidgwick Ave, Cambridge CB3 9DA, Cambridgeshire, England"]	Times Cited in Web of Science Core Collection: 2 Total Times Cited: 2 Cited Reference Count: 98	10.1016/j.jas.2022.105598	Variational Autoencoders;Hierarchical clustering;Pottery studies;Roman archaeology;Commonware pottery;Deep learning;Unsupervised learning;Machine learning;Artificial intelligence;Shape analysis;Shape matching;Heritage science;SHAPE;CLASSIFICATION;REPRESENTATION
VISION-BASED BONE IMAGE RECOGNITION USING GEOMETRIC PROPERTIES	2010	IRANIAN JOURNAL OF SCIENCE AND TECHNOLOGY TRANSACTION B-ENGINEERING	1028-6284 J9 - IRAN J SCI TECHNOL B JI - Iran. J. Sci. Technol. Trans. B-Eng.	34	597-604 WE - Science Citation Index Expanded (SCI-EXPANDED)	Chalechale, A and Bahri, A and Vatanchian, M	["Razi Univ, Dept Comp, Fac Eng, Kermanshah, Iran", "Univ Bu Ali Sina, Dept Vet Med, Fac Paravet Sci, Hamadan, Iran", "Univ Bu Ali Sina, Dept Biol, Fac Sci, Hamadan, Iran"]	Times Cited in Web of Science Core Collection: 0 Total Times Cited: 0 Cited Reference Count: 11		Visual properties;bone recognition;geometric features;Bone and Bones
What plant is that? Tests of automated image recognition apps for plant identification on plants from the British flora	2020	AOB PLANTS	2041-2851 J9 - AOB PLANTS JI - Aob Plants	12		Jones, HG	["Univ Dundee, Sch Life Sci, Div Plant Sci, James Hutton Inst, Dundee DD2 5DA, Scotland", "Univ Western Australia, Sch Agr & Environm, Perth, WA 6009, Australia"]	Times Cited in Web of Science Core Collection: 17 Total Times Cited: 17 Cited Reference Count: 25	10.1093/aobpla/plaa052 WE - Science Citation Index Expanded (SCI-EXPANDED)	Apps;artificial intelligence;image recognition;plant identification;smartphones
