# Supplementary material for: Making sense of fossils and artefacts: a review of best practices for the design of a successful workflow for machine learning-assisted citizen science projects
Source: PeerJ. 2025 Feb 13;13:e18927. doi: 10.7717/peerj.18927 (PMC11830368; doi:10.7717/peerj.18927)
Supplement: Supplemental Information 2 [file peerj-13-18927-s002.xlsx]

## Sheet: Supplemental Data S2
Title: Making sense of fossils and artefacts: A review of best practices for the design of a successful workflow for machine learning-assisted citizen science projects.
Journal: PeerJ
1st Author: Isaak Eijkelboom; Naturalis Biodiversity Center, Darwinweg 2, 2333 CR Leiden, the Netherlands; Department of Earth Sciences, Faculty of Geosciences, Utrecht University, Princetonlaan 8A, 3584 CB Utrecht, the Netherlands; isaak.eijkelboom@naturalis.nl
Supplemental Data S2 Results, workflows and suggestions for workflows and further research from reviewed articles
title (reference)	Inclusion criteria	summary	workflow treated in paper	suggestions future workflow
A deep-learning model for predictive archaeology and archaeological community detection (Resler et al., 2021)	CS data and/or data attainable by CS, artefacts	Classification often ambiguous; discern artefacts by site and period based on CNN; performs as well as or better than experts; model has the capacity to reveal yet unknown patterns across dataset	Images and data from online repository; transfer learning (pretrained model); data augmentation (standard); composition model (5 models)	Metadata carries significant weight for effective network learning and should be included in future work
An Image-Based Class Retrieval System for Roman Republican Coins (Anwar et al., 2020)	CS data and/or data attainable by CS, artefacts	Coin classification framework with GUI. Displaying prediciton and metadata from a standard reference book	Coin Image Segmentation, Local Features Extraction, Parallel Features Matching, Maximum Similarity Score Calculation for Each Coin Class, Class Ranking Based on Similarity Scores	More data, more computational power
An Open System for Collection and Automatic Recognition of Pottery through Neural Network Algorithms (Gualandi et al., 2021)	CS data and/or data attainable by CS, artefacts	AI-based application to recognise archaeological pottery, two complementary machine-learning tools for shape and decorative features, scarce data, imbalanced classes, minute differences, creation of mobile app	Central role for archeologists, combining appearence and shape based recognition classifiers, shape based: making 3D models and shattering them synthetically as well as real pot sherds. Surface feature based: simple data augmentation to diversify dataset. Code etc. shared publically.	Need for more data that is FAIR. Need for adding metadata.
Applications of deep learning to decorated ceramic typology and classification: A case study using Tusayan White Ware from Northeast Arizona (Pawlowicz and Downum, 2021)	CS data and/or data attainable by CS, artefacts	Model for classifying painted pottery sherds. Performs as well or better than experts. Analysis of which details of decorative attributes are most useful for classifying potsherds through heat maps. Opens up "black box" of decision making in ML.	Labeling the dataset, training with pre-trained model and an ensemble appoach. Standard data augmentation. Grad-CAM (Gradient-based Class Activation Maps) used for visualising most relevant area for decision making.	Need for a larger number of typed sherds, improve type definitions, eliminate types that cannot be well defined. Larger models, bigger input images. Incorporate more types. Incorporate metadata in output. Develop app and accessible database with metadata.
Applying automated object detection in archaeological practice: A case study from the southern Netherlands (Verschoof-van der Vaart and Lambers, 2021)	CS data and/or data attainable by CS, artefacts	Testing a deep learning model trained for archeological object detection in Lidar data on a different dataset. "Combined human-computer strategies are argued, in which automated detection has a complementary, rather than a substitute role, to manual analysis."	WODAN 2.5: "(1) a preprocessing part that converts LiDAR data into input images; (2) an object detection part; (3) post-processing results into geospatial vectors, directly usable in a GIS; (4) post-processing: Location-Based Ranking (LBR) incorporates domain knowledge into the workflow"	"Future research will focus on improving the performance of WODAN, for instance by combining citizen science and automated detection". Incorporation of additional data sources.
Combining Deep Learning and Location-Based Ranking for Large-Scale Archaeological Prospection of LiDAR Data from The Netherlands (Verschoof-Van der Vaart et al., 2020)	CS data and/or data attainable by CS, artefacts	A ML workflow for detection of archaeological objects is presented. The model performs better with a curated testing dataset that resembles the real world. However, it doesn't outperform a model trained on CS data.	WODAN 2.0: LiDAR data is preprocessed; object detection with ML; "post-processing of results into geographical vectors" in order to apply "Location-Based Ranking to reduce false positives based on location"	"future research will therefore focus on improving the precision of the workflow. A possible improvement lies in the use of CNNs pre-trained on remotely sensed data... future research will also focus on different means to combine [ML + CS], for instance by incorporating the results of Heritage Quest in the training dataset, or by developing a task allocation strategy"
Computer Algorithm for Archaeological Projectile Points Automatic Classification (Flores et al., 2019)	CS data and/or data attainable by CS, artefacts	Use of support vector machines (SVM) algorithm and an international classification scheme to classify projectile points. Based on simple images. "pre-segments of the projectile point components allow us to compare variated datasets"	Workflow mainly consists of stepwise decision making fot the algorithm with lots of yes/no splits. "The GUI allows to manage the images, select and combine the categories to be classified, visualize the results, and automatically store the classified images."	Incorporate metadata regarding "ethnicity, functionality of the artifact, temporality" resulting from analyses such as "microscopic wear studies, breakage analysis, experimental archaeology, and the like". The developed software will be made available and expanded to allow users to incorporate their own datasets.
Integrating Remote Sensing, Machine Learning, and Citizen Science in Dutch Archaeological Prospection (Lambers et al., 2019)	CS data and/or data attainable by CS, artefacts	"We here present an innovative integrated workflow that combines machine learning approaches to automated object detection in remotely sensed data with a two-tier citizen science project that allows us to generate and validate detections of hitherto unknown archaeological objects, thereby contributing to the creation of reliable, labeled archaeological training datasets."	Collaboration between CS, academics and data scientists in the definition of the research project. Collecting data by CS and using is as a trainingdataset for ML can both lead to new discoversies. Next the newly discovered items of interest are validated by CS/experts. Insights will be taken into account for the next itteration, improving dataset quality and object detection performance.	Retention of CS is imporant for long-term projects. This will be done through regular feedback and support, in collaboration with CS groups to provide training and information. "Combining training data from different projects is likely to enhance the performance and transferability of multiple detection algorithms"
Interactive annotation of geometric ornamentation on painted pottery assisted by deep learning (Lengauer et al., 2022)	CS data and/or data attainable by CS, artefacts	"In this work, we propose an effective annotation system, which allows a domain expert to interactively segment and label parts of digitized vessel surfaces." Classifying and analysing large surface pattern collections "can answer research questions like pattern variability or change over time."	The workflow consists of making annotations for both vessel parts and geometric patterns. This annotation interface also shows the best match, the previous annotations for that group and related pattern classes. After selecting a pattern class, the image features are extracted and similarity is computed	Work towards "a single input modality throughout the entire system." Evaluate annotation efficiency "by conducting an encompassing user study with domain experts." Assist users through pre-segmentation of patterns. Extend and/or build up a new taxonomy of patterns.
Mask R-CNN-Oriented Pottery Display and Identification System (Wei, 2022)	CS data and/or data attainable by CS, artefacts	"we propose a Mask R-CNN-based pottery identification method to build an automatic pottery identification system." Improvement of the loss function to compensate for small datasets. Using outer contours to improve classification. "our method performs well in both feature capture at the two-dimensional level and three-dimensional level of pottery".	The 'pottery recognition system' or pipeline consists of a 'pottery recognition algorithm unit' and a 'pottery characteristics and category processing unit' followed by a 'maximum circumscribed matrix calculation', a 'pottery type mask & pottery shape mask' and a 'computer vision control system'.	"In future research, we will try to add a generative adversarial neural network as an auxiliary classification in the adversarial network to optimize the recognition of spatial pattern features during pottery pattern feature segmentation and improve the robustness and generalization of the network."
The automatic recognition of ceramics from only one photo: The ArchAIDE app (Anichini et al., 2021)	CS data and/or data attainable by CS, artefacts	"ArchAIDE worked to support the essential classification and interpretation work of archaeologists (during both fieldwork and post-excavation analysis) with an innovative app for tablets and smartphones. The collaborative work of the archaeological and technical partners created a pipeline where potsherds are photographed, their characteristics compared against a trained neural network, and the r…	For the shape-based identification synthetic training data was generated by artificially shattering 3D models of pottery. The model is trained on the point clouds from the side proile of a sherd. The decoration-based identification is a CNN. The model implements a large dropout (80%) "to reduce the overfitting that may occur with large feature vectors."	Adding more data and incorporating additional metadata (location, associated material).
Unsupervised clustering of Roman potsherds via Variational Autoencoders (Parisotto et al., 2022)	CS data and/or data attainable by CS, artefacts	"In this paper we propose an artificial intelligence imaging solution to support archaeologists in the classification task of Roman commonware potsherds... The partiality and handcrafted variance of the fragments make their matching a challenging problem ... Results are commented both from a mathematical and archaeological perspective so as to unlock new research directions in both communities."	"we propose to pair similar profiles via the unsupervised hierarchical clustering of non-linear features learned in the latent space of a deep convolutional Variational Autoencoder (VAE) network. Our contribution also include the creation of a ROman COmmonware POTtery (ROCOPOT) database, with more than 4000 potsherds profiles extracted from 25 Roman pottery corpora, and a MATLAB GUI software for …	"Firstly, we plan to increase the number of profiles available in our database; secondly we will develop a specific online tool which will aid in the classification of profiles of new commonware potsherds... Finally, we aim to train the network to include other parts of the vessels (bases, main body) in its similarity search and fully incorporate the feedback (validation) of the archaeologists in…
An automated pipeline for supervised classification of petal color from citizen science photographs (Perez-Udell et al., 2023)	CS data and/or data attainable by CS, colour	"provides a flexible, robust, and easily adjustable approach for the classification of color images from citizen science repositories ... it greatly reduces the time and effort required to score large data sets and also provides a much more consistent method of classification than conventional manual scoring."	4 scripts that: download images, examin pixel colours, segment object of interest and classify images. "We use the HSV model to describe the color (H), the amount of gray in the color (S), and the brightness of the color (V)"	No improvements suggested on workflow
A Granularity-Based Intelligent Tutoring System for Zooarchaeology (Subirats et al., 2019)	CS data and/or data attainable by CS, fossils	Tutoring system for students; for identifying fossil finds; identifying taphonomic features; random forest best performance; usefull for beginners and more experienced students	Descriptive analysis; ML: random forest, support vector machine, naive bayes, neural networks, k-nearest neighbors; description of taxonomy, anatomy, taphonomy (both macro and micro)	More data from different sites (sources) to minimise overfitting
Automatic taxonomic identification based on the Fossil Image Dataset (>415,000 images) and deep convolutional neural networks (Liu et al., 2023)	CS data and/or data attainable by CS, fossils	CNN's trained on data from web crawl (public data). "Visual explanation methods further highlighted the discrepancies among different fossil clades and suggested similarities between the identifications made by machine classifiers and taxonomists." Collecting more data, including CS data can improve results. The model has been put on a server or public access.	Data collected with web crawlers. Models were widely used pretrained models. Data augmentation includes adding random noise, random cropping, rotating, resizing. Feature visualisation used to explain the results of the CNN	"Collecting large paleontological datasets from various sources, such as the literature, digitization of dark data, citizen-science data, and public data from the Internet may further enhance deep learning methods and their adoption." Publishing the model on a web server may further contribute to data collecting
Fossil brachiopod identification using a new deep convolutional neural network (Wang et al., 2022)	CS data and/or data attainable by CS, fossils	"we propose a new tailored Transpose Convolutional Neural Network (TCNN) in order to automatically identify brachiopod fossils" which "can achieve a high identification accuracy using a smaller training data set" compared to a traditional CNN. This is relevant for small datasets of rare fossils.	"The samples were all photographed and constitute a package of dataset with 3716 brachiopod photos" which may differ in view of the brachiopod (which sometimes is fragmented). Methods for upsampling the dataset while minimising overfitting are used. The TCNN incorporates a Convolutional Transpose Layer and a Concat layer to merge the Batch Normalization layers.	More data from different species is required to add more species to the model. The accuracy for identification of fragemented material is not clear from the current dataset (so by adding more fragmented material to the dataset this might be tested).
VISION-BASED BONE IMAGE RECOGNITION USING GEOMETRIC PROPERTIES (Chalechale et al., 2010)	CS data and/or data attainable by CS, fossils	"An effective approach for bone image analysis, including segmentation and recognition is presented in this paper... The first-level classification is used to distinguish different kinds of bone and the second-level to recognize the right animal to which the bone belongs."	"Bone segmentation is carried out by K-means clustering of the bone image, whereas the recognition phase is based on feature extraction and two-level statistical classification... Several image features, including geometric and moment invariants (regular and Zernike), are derived for recognition."	Improvements in identifying animal species "can be accomplished by employing more sophisticated methods working on local features instead of global features... The proposed method can be easily expanded for other disciplines including human bone recognition, and for diagnosis of bone diseases."
Thinking like a naturalist: Enhancing computer vision of citizen science images by harnessing contextual data (Terry et al., 2020)	CS data and/or data attainable by CS, metadata	"We built multi-input neural network models that synthesize metadata and images to identify records to species level" which performs better than a ensemble model that includes metadata. "This suggests that contextual data are being used to interpret an image, beyond just providing a prior expectation... Although complex relationships between disparate sources of information can be profitably inte…	Incorporation of the metadata in the ML model "led to a one-dimensional metadata vector of length 47 (day-of-year, latitude, longitude, 14 daily maximum temperature records, 8 weekly average temperature records, 21 habitat frequencies and recorder experience) associated with each image." In the best perfoming model, the image ML model and metadatamodel were concatenated before the FC and softmax …	More data augmentation, ensembling more models, more data, new approaches for generating more synthetic trainingdata, more metadata factors.
Digital taxonomist: Identifying plant species in community scientists' photographs (De Lutio et al., 2021)	CS data and/or data attainable by CS, metadata, imbalanced classes, hierarchy	Incorporating metadata in the model improves model performance. "Moreover, we have verified that exploiting the hierarchical structure of biological taxonomy not only improves the species recognition performance, but also enables more reliable predictions at coarser taxonomy levels, and even coarse classification of species not seen at all during the classifier training."	"We find that a model combining the community science images, spatio-temporal context, hierarchical labels and remote sensing images trained in a joint manner with a late fusion strategy performs the best." The late fusion strategy prevents overfitting. Workflow only inlcudes "Research Grade" observations and class balancing is applied.	With regards to using the proposed method for CS data verification: "the proposed method could provide hints to the community scientist when labelling the species, or it could facilitate the reviewing validation by experts, marking specific observations where the model disagrees with the label provided by the community scientist."
Deep learning identification for citizen science surveillance of tiger mosquitoes (Pataki et al., 2021)	CS data and/or data attainable by CS, small dataset	"Based on Mosquito Alert’s curated database of expert-validated mosquito photos, we trained a deep learning model to find tiger mosquitoes (Aedes albopictus)"	CS data is validated by experts. A pretrained CNN was used to train on the mosquito dataset. The model performance was evaluated through cross-validation, a ROC AUC score and a confusion matrix.	"In the future, it is likely that different sources of data could be combined in order to improve automated mosquito classification together with technical and deep learning methods refinement."
Auroral classification ergonomics and the implications for machine learning (McKay and Kvammen, 2020)	CS data biases	Discrepancy between expert classifier shows it is important to identify and address potential sources of expert-injected bias. Identified biases are: physical comfort bias, data contrast bias, environment contrast bias, repetition bias, learning bias, feature bias, ambiguity bias, expert knowledge bias	Not applicable	"classifying images in random and chronological order could be supplemented by a classification in reverse chronological order, with an examination of the results for potential hysteresis in the category selected. Specifically designed experiments could also be devised to test different biases in isolation. Ideally, these would be more generic, applying to machine-vision training more generally r…
CNN-Based Classifier as an Offline Trigger for the CREDO Experiment (Piekarczyk et al., 2021)	CS data biases	Gamification helps with CS engagement, but increases the fals signals due to competition (cheating) or hardware malfunctions. Here ML is used to identify these false signals, thus keeping the increased engagement and minimising the disadvantages.	A subset of the images is labelled as "signal" or "artefact". Different ML methods were tested and evaluated for accurately distinguising the two categories. The preprocessing methods all performed well, making the raw RGB based CNN classification favorable due to time efficiency.	"The natural extension of the presented methods is to increase the number of signal classes so that various types of particle tracks can be identified. This research is currently under way."
Correcting misclassification errors in crowdsourced ecological data: A Bayesian perspective (Santos-fernandez et al., 2020)	CS data biases	"data elicited from citizens is likely to be imprecise and biased... We present a spatial Bayesian hierarchical model to account for misclassification errors, as well as spatial dependence in the data.	"we propose a Bayesian hierarchical spatial model used to correct misclassification errors and estimate the latent proportion of the target region occupied by a given species or ecological community... The participants’ abilities are expressed in terms of sensitivity and specificity of a correctly classified set of points on the images."	Multiple extensions to the model are proposed, as well as the use of different statistical methods. "Finally, the integration of coral cover data from CS programmes and professional and scientific monitoring programmes could also strengthen the model and produce more precise and robust estimates."
Handling uncertainty in citizen science data: Towards an improved amateur-based large-scale classification (Jimenez et al., 2019)	CS data biases	"the research community tends not to trust Citizen Science outcomes, claiming a generalised lack of accuracy and validation. We introduce a novel multi-stage approach to handle uncertainty within data labelled by amateurs in Citizen Science projects... our approach is able to greatly boost accuracy and classify more images with respect to the state-of-art."	"Firstly, our method proposes a set of transformations that leverage the uncertainty in amateur classifications. Then, a hybridisation strategy provides the best aggregation of the transformed data for improving the quality and confidence in the results."	Experiment with larger datasets/more classes. Aggregate info regarding participants'/experts' expertise. "we aim to study the merging of all information available about the problem, pursuing the best results and utility of Citizen Science outcomes for science and research."
Maximizing citizen scientists' contribution to automated species recognition (Koch et al., 2022)	CS data biases	"In this study, we investigated how the amount of training data influenced the performance of species recognition models for various taxa... Regardless of the specific taxa and derived values, our findings demonstrate that a more informed decision is possible when choosing to focus on certain taxa for data collection aimed at improved recognition models."	Value of Information (VoI)': evaluate the value of (additional) data for different classes in a ML model. "we define the VoI as the expected increase in model performance (F1 score) when adding one observation with at least one image. To estimate this, for every order included in the experiment, the increase in average F1 score over increasing training task sizes were fitted using the Von Bertala…	"Awareness of the potential differences in VoI between taxa is warranted, and an interesting consideration to evaluate in future studies." Additionally, "increased implementation of data practices such as persistent storage, metadata standardization and the other FAIR data principles to enable more apt usage of image data for current and novel applications."
Measuring agreement among experts in classifying camera images of similar species (Gooliaff and Hodges, 2018)	CS data biases	"Here, we measure agreement among experts in distinguishing between images of two similar congeneric species ... Overall, experts had moderate agreement" but the results "suggest that classification of images by a single expert is unreliable for similar‐looking species" and that "even majority classifications may be incorrect."	Subsampled dataset to test different factors: "(a) season, (b) background habitat, (c) visible features of the animal, and (d) time of day in im-ages, and (e) whether we provided the location of images to the experts" and (f) a retrial of the first set months later to test consistency. "we measured agreement among experts ... using Fleiss’ kappa (K), which measures reliability among a group of cl…	The authors recommend using multiple experts to classify your dataset and for experts to express doupt regarding a classification. "Further, we recommend that researchers be explicit about their methods for classifying images" and to include metadata about the classifications in the dataset (who and how many people classified etc).
Recognizability bias in citizen science photographs (Koch et al., 2023)	CS data biases	"In this study, we trained recognition models for various taxa, and found evidence for a ‘recognizability bias’, where species that are more readily identified by humans and recognition models alike are more prevalent in the available image data. This pattern is present across multiple taxa, and does not appear to relate to differences in picture quality, biological traits or data collection metr…	CNNs were trained on CS data, testing performance for different metrix: data availability, F1-score, species in Norway, picture quality (area of piture occupied by object of interest), urbanness, nad-wing index, body mass, habitat openness, documentation rate, picture density, observation rate.	More data, especially of rare taxa, and metadata can help improve models. Regardless, taxonomic knowledge of experts is required. "Preserving this knowledge, and making it available in the form of identification keys is vital."
Statistical solutions for error and bias in global citizen science datasets (Bird et al., 2014)	CS data biases	CS data is perceived "to contain greater levels of variability (e.g., measurement error) or bias (e.g., spatio-temporal clustering) in comparison to data collected by scientists or instruments. Modern analytical approaches can account for many types of error and bias typical of CS datasets.... Even so, achieving the full potential from CS projects requires meta-data describing the sampling proces…	"It is possible to (1) describe how pseudo-replication in sampling influences the overall variability in response data using mixed-effects modeling, (2) integrate data to explicitly model the sampling process and account for bias using a hierarchical modeling framework, and (3) examine the relative influence of many different or related explanatory factors using machine learning tools. Informatio…	"consider the main issues with the dataset, how they will affect the question being asked and then to choose the best method to deal with those issues." Ideally design the workflow with these issues in mind. Also, record metadata about the survey execution (e.g. observer id). Finally, "consider whether it is possible to collect data that will allow characterization of this bias" that is present i…
An automated pipeline for supervised classification of petal color from citizen science photographs (Perez-Udell et al., 2023)	CS data quality	Color (RGB) is an unrelyable variable in a diverse CS picture dataset. Using the hue‐saturation‐value the authors show that images can be classified based on color. The author's "approach allows images to be used even when taken under different light conditions and at different angles."	4 scripts that: download images, examin pixel colours, segment object of interest and classify images. "We use the HSV model to describe the color (H), the amount of gray in the color (S), and the brightness of the color (V)"	The authors "provide recommendations for taking photographs for this type of usage to help guide the creation of new data sets or broaden the viability of existing citizen scientist data sets"
Citizen science decisions: A Bayesian approach optimises effort (Mugford et al., 2021)	CS data quality	"This study has shown that by adopting a more sophisticated collective classification method than a simple majority vote procedure citizen science projects could optimise the citizen scientist’s efforts. By making a citizen science project more effort efficient large gains could be generated in both the research value of the data and the engagement of the citizens."	"We use a simplified version of the Independent Bayesian Classification Combination (IBCC) model to estimate user identification accuracies and classify observations... The IBCC model allows citizen science projects to estimate user accuracies and collectively classify observations when there is no known ground truth for any observations"	The authors aim for a more computationally eficient model. Also, future work will involve comparing computer vision techniques that have been used through the itterations of the project and make differences clear.
Crowds Replicate Performance of Scientific Experts Scoring Phylogenetic Matrices of Phenotypes (O'Leary et al., 2018)	CS data quality	"Here we explore whether crowdsourcing can be used to collect matrix data on a large scale with the participation of nonexpert students, or “citizen scientists.”... We introduce a procedure that predicts the difficulty of each character and that can be used to assign harder characters to experts and easier characters to a nonexpert crowd for scoring."	Data is collected through a crowdsourcing application. Experts can validate input from nonexperts. Statistical models predict the difficulty of the task and distributes the tasks depending on the performance of the contributors. This reduces the work for experts while maintaining a high accuracy.	"future emphasis might be placed on such innovations as automated or robotic capture of images" as to generate more data at a higher speed.
Deep learning identification for citizen science surveillance of tiger mosquitoes (Pataki et al., 2021)	CS data quality	A ML model can help improve CS data quality. It's "a helpful pre-selector for the expert validation process... we also explored the possibilities of using the model to improve future data collection quality as a feedback loop."	"the quality can be measured by the usefulness of the photos from the viewpoint of the expert validator or a CNN". The spatial and temporal metadata provides insight into the "evolution and dependence of the citizen-based mosquito image quality."	No suggestions for future workflows
Fossil Atmospheres: a case study of citizen science in question-driven palaeontological research (Soul et al., 2018)	CS data quality	Three key lessons: "(i) Acknowledge and address participants’ uncertainty about their ability to complete the tasks satisfactorily... (ii) Scaffold the data collection process to accommodate various levels of expertise... (iii) provide data collection examples and annotated graphics to illustrate attributes of an expert classification."	CS annotated data through Zooniverse. Identifying stomata and epidermla cells in SEM images. A short tutorial prepared volunteers for task, "contextualising the training in science practice." A beta-testing phase gave valuealbe feedback. Workflow involves practice and different difficulty levels. Through certain wording and a message board motivation and self-efficacy are addressed. Data was anal…	Three suggestions: aggregating counts in cells will make sure all cells are counted. Compare online vs in person training (the later would mean that you train/involve a smaller number of CS). Increase educational value by evaluating information provided to the users and their effect on participation by CS.
Knowledge Tracing to Model Learning in Online Citizen Science Projects (Crowston et al., 2019)	CS data quality	A Bayesian ML model is pesented for training CS in classification tasks and present tasks based on the experience of the user, making productive contributions. "The model can be used both to estimate the ability of volunteers and to decide the classifiction of an image".	In the model, classifications are assigned based on confidence of ML classification and % of human agreement with ML. Subsets include 'training set for beginners', 'to be classified by trained volunteers' and 'images of other known or unknown classes'. % cutoffs to be determined empirically.	Compare "the performance of volunteers with and without training". Explore extensions such as modelling forgetting, active learning and considering the number of existing classifications of a given class.
Leveraging Pattern Recognition Consistency Estimation for Crowdsourcing Data Analysis (Shamir et al., 2016)	CS data quality	"Here, we propose a method to estimate the consistency of the annotations of human classifiers in citizen science projects." The method reduces the number of annotations needed per observation, improves the quality of the data and the CS user experience by providing real time feedback.	CS quality is based on classification accuracy, with same data and model. "lower automatic classification accuracy can be used as an indication that the training data are less clean compared to datasets that provided higher automatic classification accuracy". It does not require ground truthed data.	No suggestions for future workflows
Limitations of Majority Agreement in Crowdsourced Image Interpretation (Salk et al., 2017)	CS data quality	The authors "investigate how best to evaluate the difficulty of crowd-sourced tasks and to what extent this is possible based on volunteer responses alone." And provide a "series of recommendations for managing the challenges posed by heterogeneous tasks in crowdsourcing campaigns."	CS game with yes, no, maybe answers. Competition element: earning points and winning prizes. 'Correctness' based on mayority agreement. Three "task difficulty metrics" were used: "volunteer-expressed uncertainty, inter-volunteer disagreement, and expert evaluation"	"Lessons for Game Design: Clearly Define the Task and Questions; Develop an Expert-Validated Image Bank Before Opening the Game to Public Participation; Provide Explicit Guidance, Especially When a New Volunteer Joins; Monitor Volunteer Performance in Real Time; Encourage Expression of Uncertainty; Beware of Loopholes that Volunteers can Abuse"
Maximizing human effort for analyzing scientific images: A case study using digitized herbarium sheets (Brenskelle et al., 2020)	CS data quality	"Here we provide guidance on the design and implementation of image annotation projects ... key factors included traits and taxa being scored, the annotation setting, and the individual scorer. In-person annotations were significantly more accurate than online annotations, but both generated relatively high-quality outputs. Gathering multiple, independent annotations for each image improved overa…	"We used a novel gold-standard data set to test the accuracy of human phenological annotations of herbarium specimen images in two settings: structured, in-person sessions and an online, community-science platform. We examined how different factors influenced annotation accuracy"	"Best practice recommendations: (1) Identify particularly difficult species/classes of traits to anno- tate before launching the annotation project; (2) Develop informative training materials; (3) balance downsampling and image compression to maximize the visual quality of the images; (4) Perform in-person annotations; (5) Perform majority-rule scoring and/or distribute effort evenly among volunt…
On the impact of Citizen Science-derived data quality on deep learning based classification in marine images (Langenkämper et al., 2019)	CS data quality	"In this study, we investigated how the combination of citizen science, to detect objects, and machine learning, to classify megafauna, could be used to automate annotation of underwater images." The authors analysed "the relationship between the outcome of a citizen science study and the quality of the classifications of a deep learning megafauna classifier." For a meaningful contribution, CS ne…	"multiple large data sets of citizen science annotations with different degrees of common errors and inaccuracies observed in citizen science data were simulated by modifying “gold standard” annotations done by an experienced marine biologist. The parameters of the simulation were determined on the basis of two citizen science experiments."	"CS should be provided with clear instructions and examples" of annotation/classification task. "Doing a joint annotation session or limiting the type of objects to be detected by a group of citizen scientists, thus splitting the task into object categories would also be useful to make the task more manageable for the citizen scientists and minimize errors."
A Granularity-Based Intelligent Tutoring System for Zooarchaeology (Subirats et al., 2019)	CS platforms, apps or general public engagement	Tutoring system for students; usefull for beginners and more experienced students; "questionnaire showed that the tutor was helpful. Students suggested an improvement in the interface and the accuracy of the predictions"	Questionaire tests/asks: constructive/active learning, self-direct learning, centextual learning, global score, open answers (tips)	"natural language processing (NLP) and gamification techniques could be added to the tutor in order to enhance the student’s learning process"
A Pilot Study on Remote Sensing and Citizen Science for Archaeological Prospection (Stewart et al., 2020)	CS platforms, apps or general public engagement	Pilot for crowdsourcing datalabeling for ML tasks in archeological surveying. Seems promising, but there are numerous uncertainties as study is still ongoing	Define tasks that need to be performed; create website with user friendly interface;	No improvements for future workflow suggested
A Tale of Two Crowds: Public Engagement in Plankton Classification (Robinson et al., 2017)	CS platforms, apps or general public engagement	Crowsourcing from the general public is a great way to analyse big datasets with easy to learn tasks. "crowd-sourcing data scientists, was the most efficient approach to solving a complex bioinformatics problem." Both are expected to be required more in the future	First a gold standard dataset was created by a couple of experts (work intesive). Second crowdsource easy classification tasks (also on mobile devise). Third more detailed classification for data scientists, set up as a competition.	Crowdsourcing from a group with a priori knowledge will improve results. Classification with the help of computer scientists could be improved by judging scalability of pilot models, increasing cooperation with bioinformaticians as well as include post-competition consultancy (more communication during and after project)
A Web service platform for Web-accessible archaeological databases (Saykol et al., 2005)	CS platforms, apps or general public engagement	A platform design for various Web-accessible archaeological databases. Also allows archaeological data exchange and visual content-based queries for archaeological objects stored in databases	Decentralised platform due to diverse nature of datasets. Through a database query information from different archeological resources are retrieved. Visual searches are based on similar colour and shape feature vectors of a provided image. Results are shown in order of relevancy.	Extend platform by additional geometric search facilities (incl 3D), include more databases and introduce semantic queries
An Open System for Collection and Automatic Recognition of Pottery through Neural Network Algorithms (Gualandi et al., 2021)	CS platforms, apps or general public engagement	Mobile and desktop app designed for the full pottery analysis workflow. Stakeholders were consulted on design. Contains the recognition tool, digital assemblages for collecting and storing data. Contains reference database. App build with "an open-source Portal Server technology". Uses a single shared sign-on infrastructure. Offline storage possible.	User input through the app goes to the API server which interacts with the decoration and shape recognition model servers as well as the reference database server. Input and output for the desktop portal go through a desktop server (see their figure 11).	No improvements for future workflow suggested
Automatic Fungi Recognition: Deep Learning Meets Mycology (Picek et al., 2022)	CS platforms, apps or general public engagement	Web and mobile app were developed for fungi classification. "By providing a stream of labeled data in one direction and an accuracy increase in the other, the collaboration creates a virtuous cycle, helping both communities." (professional and citizen scientists)	The "recognition server is based on the open-source TensorFlow Serving framework" with a pretrained model from this paper deployed. "The user can manually inspect the proposed species and select the best result for annotation of the fungus observation." App aims to simplify capturing metadata.	"The system is designed to be interactive and involving, requiring new users to be trained to submit high-quality records and contribute actively to the validation process. The development of automatic response options, for example, addressing common issues related to the poor quality of submitted photos or inadequate meta-data, could solve some of these issues in the future, potentially using AI…
Automatic taxonomic identification based on the Fossil Image Dataset (>415,000 images) and deep convolutional neural networks (Liu et al., 2023)	CS platforms, apps or general public engagement	The model was made publicly available on a web server for the benefit of CS and public outreach.	"We deployed the DCNN on a server for end-to-end fossil clade identification at www.ai-fossil.com."	No improvements for future workflow suggested
Citizen Science and Climate Change: Mapping the Range Expansions of Native and Exotic Plants with the Mobile App Leafsnap (Kress et al., 2018)	CS platforms, apps or general public engagement	A mobile app for identification of tree species. The vast amount of CS data and ML "were used to map the geographic distribution of native and exotic species at a scale previously unachievable without this technology and without the aid of citizen scientists."	The app presents the user with a list of possible IDs including a short description and images of different parts of the species. Also includes a reference database for manually IDing. In this case users label their image and upload it to the server with location data	By using new techniques such as deep learning, models can be improved and more different taxa can be incorporated (which now already exists).
CITIZEN SCIENCE AND GAMIFICATION FOR CULTURAL HERITAGE (Senatore et al., 2020)	CS platforms, apps or general public engagement	By appyling concepts from social media for engagement with the broad public, this app helps protect cultural heritage. 3D models are generated from pointclouds, based on images from the public.	"Our project is based on the use of the game as a lever to stimulate participation through a social process and the use of automatic procedures for transforming photographic data into metric data in the form of a point cloud to obtain scientific data on the process."	No improvements for future workflow suggested
Citizen science archaeological finds on the Semantic Web: the FindSampo framework (Hyvönen et al., 2021)	CS platforms, apps or general public engagement	"FindSampo fosters collecting, sharing, publishing and studying archaeological finds discovered by the public... FindSampo is based on the ‘Sampo model’ using the “FAIR guiding principles for scientific data management and stewardship”"	Consists of "a mobile find-reporting system; a semantic portal for researchers, the public and collection managers to use; and a Linked Open Data service for creating custom data analyses and for application developers."	Test applicability of framework on different scales (temporal and spacial) and on different datasets. "These initiatives push towards a deeper understanding of the agency of the public as creators of new knowledge about the past."
Deep learning identification for citizen science surveillance of tiger mosquitoes (Pataki et al., 2021)	CS platforms, apps or general public engagement	A ML model can help improve CS data quality. It "promises not only a helpful pre-selector for the expert validation process but also an automated classifier giving quick feedback to the app participants, which may help to keep them motivated."	"a careful review of the mispredicted images led us to useful insights into what makes a photo hard to classify for the deep learning model... If participants avoid confusing setups when taking photos, this can improve the accuracy of the automated classification."	"These guidelines can be added to the Mosquito Alert application to help partici- pants make good images of mosquitoes."
Flora Capture: a citizen science application for collecting structured plant observations (Boho et al., 2020)	CS platforms, apps or general public engagement	"Flora Capture allows experts, laymen and citizen scientists to collect a digital herbarium and share structured multi-modal observations of plants. Collected images contribute, e.g., to the training of plant identification algorithms, but also suit educational purposes. Additionally, presence records collected with each observation allow contribute to verifiable records of plant occurrences acro…	Registration in the app allows to keep track of observations. "A complete observation consists of all images, the information acquired via the questionnaire and metadata, such as time, date, and geolocation of the observation." Users are informed visually of the progress while recording an observation. "Decoupling recording and synchronization of observations enables users to take observations at…	"Future versions of the app will successively cover a larger pool of species and potentially require a revision of the available growth forms." Depending on future uses of the dataset (mapping, supplement to museum collections) the output can be tailored. Gamification can help inspire previously uninvolved CS participation.
How citizen scientists contribute to monitor protected areas thanks to automatic plant identification tools (Bonnet et al., 2020)	CS platforms, apps or general public engagement	The CS platform Pl@ntNet is presented, discussing the strengths and limitations and recommendations for future initiatives. "Conservation practitioners can benefit from these platforms: (i) if they are committed to make data available and allow access and use by contributors and (ii) if they support computational development by ensuring that the diversity of participants’ expectations is taken in…	Different workflows are possible with the platform and two examples are given. CS can provide data to train AI tool which is to be used by CS and experts and externaly validated. Reversely, experts can validate data with which the AI tool is trained, to be used by CS.	"the use of such new (CS) tools is inevitably hampered by difficulties and sometimes scepticism among the actors involved... Communication must be targeted, in terms of format, channels of dissemination and information content. Early sharing of the objectives of the citizen science programme is essential to facilitate the involvement of participants."
The automatic recognition of ceramics from only one photo: The ArchAIDE app (Anichini et al., 2021)	CS platforms, apps or general public engagement	"ArchAIDE worked to support the essential classification and interpretation work of archaeologists (during both fieldwork and post-excavation analysis) with an innovative app for tablets and smartphones. The collaborative work of the archaeological and technical partners created a pipeline where potsherds are photographed, their characteristics compared against a trained neural network, and the r…	The app automates the outline identification and the decoration classifier. The outline identifier involves: the input piture, cropping and aligning, measuring the distance, marking points on outline resulting in the shape data. The decoration classifier involves: the input picture, cropping and aligning, white balance, interactive background removal resulting in the image data.	No improvements for future workflow suggested
The Flora Incognita app - Interactive plant species identification (Mäder et al., 2021)	CS platforms, apps or general public engagement	"We discuss the freely available Flora Incognita app ... that allows users to interactively identify plant species and capture their observations." The process is "context-adaptive and interactive" with "an intuitive interface and supplementary educational materials. The captured observations in combination with their metadata provide a rich resource for researching, monitoring and understanding …	"Three distinct data flows integrate the system's components. The identification flow handles user identification requests and records identified plants as observations. The validation flow continuously involves a team of expert botanists to review rare and critical observations, preparing new data for the next training cycle. Upon sufficient new validated observations, a training flow retrains t…	Future aims: "greater taxonomic resolution"; "the development of children-specific fact sheets" and "student-targeted species fact sheets"; include "semi-automatically and automatically captured data covering large spatial scales" in monitoring data. Future improvements will enable CS to research variability of phenology.
The Portable Antiquities of the Netherlands A Review (Carpentier, 2022)	CS platforms, apps or general public engagement	"The Portable Antiquities of the Netherlands (PAN) is an online system aimed at recording and documenting archaeological finds by the public... This review describes the context in which PAN was established, along with its current structure and scope, before looking at its different components, including the underlying database and linked data reference collection."	The website is mainly used to search the database. The app is designed for easily uploading new finds. The database and reference database adhere to the FAIR and Linked Open Data standards. Registered users can access and make use of more functionalities on the platform. Database can be filtered on metadata. Reference database is 'hierarchical'.	"For some of its functionalities, the dependency on third-party providers raises questions about its future-proofing... PAN is unclear on its policy toward fraudulent find reporting or reports that indicate improper handling of unexploded ordnance or human remains." These remarks are potential improvements to the platform/workflow.
Transdisciplinary Archaeology and the Future of Archaeological Practice: Citizen Science, Portable Science, Ethical Science (Milek, 2018)	CS platforms, apps or general public engagement	"this paper sets out an agenda for a more open approach to archaeological practice" which includes CS, portable science and ethical science.	"Specific methodological challenges" are discussed in order to arrive at a vision for the future of archaeology. The author highlights that the insights are largely gathered from personal experience.	"Specific methodological challenges that are discussed include the need to ‘flip’ the public outreach element of research designs, to embed open participation from the outset by nurturing relationships of mutual respect and trust, and to take advantage of, and improve, the portability of archaeological science, so that it can be done in and by local communities."
Unsupervised clustering of Roman potsherds via Variational Autoencoders (Parisotto et al., 2022)	CS platforms, apps or general public engagement	"we developed a MATLAB GUI which is able to effectively support the onfield work of the archaeologists" and helps "to ease and speed up the processing and matching of a very large number of pottery profiles from different corpora within a coherent and unified analytical environment."	"This is achieved by presenting the pottery specialist with a selection of most likely matches in the companion software, thus providing invaluable pointers not only in the development of a comprehensive typology of Roman commonwares, but even in the future classification of potsherds coming from new excavations."	See 'CS data and/or data attainable by CS, artefacts' row
What plant is that? Tests of automated image recognition apps for plant identification on plants from the British flora (Jones, 2020)	CS platforms, apps or general public engagement	"Nine free apps or websites for automated plant identification and suitable for use on mobile phones or tablet computers in the field were tested... Although the accuracy is good for some of the top-rated apps, for any quantitative biodiversity study or for ecological surveys, there remains a need for validation by experts or against conventional floras... Potential uses of automated image recogn…	Discussion includes comments on identification performance, error rate, confidence and consistency, camera (quality images), internet requirements, and target audience. "Three systems were used to assess performance of the different apps... (i) First choice (top 1 prediction); (ii) Weighted score (takes account of up to the first four choices of identification); (iii) Inconsistency (variability):…	"It is likely that any app giving a better than 50 % chance of the first suggestion being the correct genus or better would be a very valuable tool to botanists and ecologists in the field... Two of the tested apps are available as APIs for incorporation into other software; this will potentially open many new applications... There is, however, a concern that their ease of use may actually act as…
A survey of computational methods for fossil data analysis (Žliobaitė et al., 2017)	Reviews, syntheses or surveys	Aim: "highlight what kind of research questions about evolutionary and environmental change can be answered by applying computational algorithms". Outcome: "a proposal for a research agenda in computational fossil data analysis". Findings: large datasets and complex computational methods make for mechanistic reportation of the algorithmic output with less biological insight and interpretation. "m…	Not applicable	"methodological guideline for what kind of research questions about relations between organisms and their environments, as well as their evolution can potentially be answered with what kind of data-driven computational techniques: 1. Formulating the research question. 2. Designing the computational task setting. 3. Defining the performance criteria. 4. Selecting which existing algorithm to use, o…
Artificial Intelligence Meets Citizen Science to Supercharge Ecological Monitoring (McClure et al., 2020)	Reviews, syntheses or surveys	Aim: describe how citizen science, AI or the integration of both can maximize outcomes for scientists and conservation managers, in the context of data collection, data processing, and data analysis. Findings: Important considerations for both CS and AI: financial resources, public angagement, subject charisma, subject identifiaction, volunteer involvement, participant training, technical experti…	Not applicable	Take findings into account in project planning phase
CITIZEN SCIENCE IN ARCHAEOLOGY (Smith, 2014)	Reviews, syntheses or surveys	Aim: "An exclusive reliance on professional archaeologists for data collection and management has negative implications for researcher workload as well as for stakeholder satisfaction... A powerful solution that addresses both the professional labor bottleneck and the desire for public engagement can be found in the use of a citizen science approach." This approach is here explored. Findings: "Ar…	Not applicable	See 'findings'. "Through greater inclusion, our discipline can gain not only new sources of data but also new understandings of participants' roles in shaping research agendas and results... citizen science provides energizing and transformative opportunities for public-professional interactions that reflect the excitement of studying the human past."
Digital Support for Archaeology (Boon et al., 2009)	Reviews, syntheses or surveys	Aim: "In this contribution, we describe the tools that were developed within the RICH project, and we reflect on the virtues of the cross-fertilization between the archaeological and the computer science domain." Findings: The different tools described relate to (3D) digitisation of collections/data, automatic identification techniques and faster searching of texts/reports. "a successful interdis…	Not applicable	The authors emphasise that communication is needed in order to work in an interdisciplinary team of computer scientists and archaeologists.
Digital Zooarchaeology: State of the art, challenges, prospects and synergies (Spyrou et al., 2022)	Reviews, syntheses or surveys	Aim: "this article aims to provide a snapshot of the current state of art, and the methods and digital tools being employed in the digitisation of animal remains." Digital reference collections and their impat on science and on the broader public are discussed. Findings: "Archaeological digital reference collections have the potential to synchronise the communication of research to both academic …	Not applicable	"It is very important to state from the very beginning our aims and objectives (whether for research, teaching, or public outreach), define our target groups and long-term potentials, make sure that we are having enough budget, choose the most appropriate digitisation technique, and consider long-term storage and archiving of our 3D models." "A good starting point would be the development of a fo…
Human-machine-learning integration and task allocation in citizen science (Ponti and Seredko 2022)	Reviews, syntheses or surveys	See 'the role of CS and ML in a project' row	Not applicable	See 'the role of CS and ML in a project' row
Machine Learning Arrives in Archaeology (Bickler, 2021)	Reviews, syntheses or surveys	Aim: "This review briefly describes what ML is, how it is being used in archaeology today, and where it might be used in the future for archaeological purposes." Findings: "ML fits well with more traditional methods used in archaeological analysis, and it remains subject to both the benefits and difficulties of those approaches. Small datasets associated with archaeological work make ML vulnerabl…	Not applicable	"managing the ML models’ misclassification ... should be part of the strategy for their use in archaeological situations." Biases created by ML models as a result of "lumping an assemblage into previously determined categories" or not "fully incorporating the variability of the features being classified" need to be addressed.
Machine Learning for Cultural Heritage: A Survey (Fiorucci et al., 2020)	Reviews, syntheses or surveys	Aim: "We survey across ML and CH literature to identify the theoretical changes which contribute to the algorithm and in turn them suitable for CH applications... we review the CH applications, features and pre/post-processing which make the algorithm suitable for its use... we give a critical look at the use of ML in CH and consider why CH has only limited adoption of ML" Findings: Reviews of di…	Not applicable	"more CH applications can take advantage of the developments in deep learning. Especially as improvements in spatial reasoning will allow the contextual understanding of the composition of iconography or other such forms which is plentiful within CH."
Narratives of epistemic agency in citizen science classification projects: ideals of science and roles of citizens (Ponti et al., 2022)	Reviews, syntheses or surveys	See 'the role of CS and ML in a project' row	Not applicable	See 'the role of CS and ML in a project' row
Smartphone Icon User Interface design for non-literate trackers and its implications for an inclusive citizen science (Liebenberg et al., 2017)	Reviews, syntheses or surveys	Aim: To review community based CS projets and "demonstrate the value of employing trackers using smartphones in large-scale, long-term monitoring of ecosystems for conservation management". Findings: "Collectively, the seven case studies reviewed in this paper demonstrate the richness and complexity of scientific data contributed by community-based citizen science. Furthermore, trackers can also …	Not applicable	Make use of a simple and clear icon user interface design. "Community-based citizen science in developing countries will require international support to be sustainable."
The Partnership of Citizen Science and Machine Learning: Benefits, Risks, and Future Challenges for Engagement, Data Collection, and Data Quality (Lotfian et al., 2021)	Reviews, syntheses or surveys	See 'the role of CS and ML in a project' row	Not applicable	See 'the role of CS and ML in a project' row
Artificial Intelligence Meets Citizen Science to Supercharge Ecological Monitoring (McClure et al, 2020)	the role of CS and ML in a project	Combined use of CS and AI opportunities: "real-time actions, improved trust in CS data and management decisions, advancement of field and management, wider scientific reach and better understanding, cost-effective monitoring potential." Challenges: "high resource needs may restrict uptake; narrow dissemination of information, potential false pos/neg from inaccuracy or bias."	Not applicable	Take findings into account in project planning phase
Citizen science frontiers: Efficiency, engagement, and serendipitous discovery with human-machine systems (Trouille et al., 2019)	the role of CS and ML in a project	"This Perspectives piece explores the issues encountered in designing human–machine systems optimized for both efficiency and volunteer engagement, while striving to safeguard and encourage opportunities for serendipitous discovery."	To encourage participation, social community building and serendipitous discovery, a discussion forum provides a way for information sharing and exchanging ideas. Human and machine classifications together provide a more complete sample. Using ML to esitmate CS performance can be used to improve task allocation. Optimising for user experience, not efficiency, will increase contributions. This mig…	Strategies for the future include not assuming too much what will and will not be engaging to the volunteers. Continuing the ML-CS road for curating work dependent on a persons abilities and interests will increase engagement and can be used to track a persons improvements.
Deep learning increases the availability of organism photographs taken by citizens in citizen science programs (Suzuki-Ohno et al., 2022)	the role of CS and ML in a project	Low quality CS data and the experience needed to identify species make working with CS data difficult. "Deep learning solves these problems and increases the availability of organism photographs... The collaboration with deep learning and experts will increase the reliability of species identification and their use for scientific researches."	Data was collected from CS and identification were done by experts. A ML model was trained for species identification and evaluated using the "total accuracy, precision, recall, and F1-score in each class". The smallest classes were left out. Data augmentation was applied to other classes.	"In future works, we will be able to improve the accuracy of identifying species in minor classes to incorporate other methods like a linear support vector machine." Depending on the purpose of the model (high total accuracy or identifying rare species) "we must select a methodology for increasing the availability and reliability of photographs taken by citizens."
eBird: A Human/Computer Learning Network to Improve Biodiversity Conservation and Research (Kelling et al., 2013)	the role of CS and ML in a project	"Artificial Intelligence processes can dramatically improve the quality of the observational data... By guiding the observers with immediate feedback on observation accuracy, the HCLN process contributes to advancing expertise of the observers, while simultaneously improving the quality of the training data... The outcome is improved data quality that can be used for research and analysis."	A successful human-computer project must: have a task that cannot be completed by computers that is sufficiently straightforward and engaging for maximum participation. Also, "the complimentary abilities of humans and machines must be clearly identified so that they can be leveraged to increase the accuracy and efficiency of the network. Finally novel methods for aggregating and analyzing the noi…	"by implementing an uncomplicated protocol through web-based and wireless handheld devices and providing appropriate rewards for participation, citizen-science projects can recruit large numbers of participants to submit massive quantities of meaningful data."
Human-machine-learning integration and task allocation in citizen science (Ponti and Seredko 2022)	the role of CS and ML in a project	Looking at task allocation in CS projects that involve computational tech. CS projects were characterised based on "(a) the nature of the task outsourced to the crowd, and (b) the skills required by the crowd to perform a task. CS tasks are generally "well-structured, involve little interdependence, and (only) require (general) skills"	CS tasks (data processing, e.g. colleting and classifying data) require common skills and have a low level of interdependence. Expert tasks require expert skills with a medium level of interdependence (data processing, e.g. volunteer data classification, assist CS in validating objects; data analysis, e.g. solve 2D puzzles) or a high level of interdependence (data processing, e.g. gold standard d…	Look at why certain tasks can('t) be automated; for a future review, different databases and unpublished projects should be incorporated to also find out about projects that were not successful; look at ways to improve CS engagement instead of reducing it. Does the automation serve all CS or only those that know tech well?
Innovations in Camera Trapping Technology and Approaches: The Integration of Citizen Science and Artificial Intelligence (Green et al., 2020)	the role of CS and ML in a project	"the value of public engagement (for camera trapping) is being increasingly recognised, as indicated by the increasing amount of camera trap research involving citizen science... By combining citizen science with AI, it should be possible to improve efficiency and increase classification accuracy, while simultaneously maintaining and promoting the benefits associated with public engagement with, …	Consider the role of CS in a project's design in the planning stage. Think of project aims (research, engagement, education, social benefits), research questions (Do you want to think of research questions together with CS?), methodologies (e.g. meaningful CS contributions, CS quality check, CS training) and engagement (how and who to recruit and keep people interested? What might be barriers? Ho…	CS-ML can be applied to: (1) ML trained on data classified by CS; (2) CS + ML reaching a consensus on a classification; (3) using ML to filter out non/easy classifications to better make use of CS/expert's time; (4) data collecting done by CS, classification by ML.
Narratives of epistemic agency in citizen science classification projects: ideals of science and roles of citizens (Ponti et al., 2022)	the role of CS and ML in a project	"We examined the distribution of tasks between citizen scientists, experts, and algorithms, and how epistemic agency was enacted in terms of whose knowledge shapes the distribution of tasks, who decides what knowledge is relevant to the classification, and who validates it... We consider the implications of the emphasis on optimization on the ideal of science and the role of citizen scientists fr…	(1) "we searched for documents about CS classification projects using ML"; (2) "we produced meta-summaries of documents containing information relevant to address our research questions."; (3) "to analyse the meta-summaries, we used qualitative content analysis (QCA)"	"we relied solely on secondary sources without incorporating other methods (e.g., interviews) that could help reduce bias and compensate for the dearth of documents and their incompleteness. Since most research papers tend to report on successful rather than unsuccessful projects, we are likely to have been exposed to mostly successful divisions of labour instead of those that did not work." Furt…
The Partnership of Citizen Science and Machine Learning: Benefits, Risks, and Future Challenges for Engagement, Data Collection, and Data Quality (Lotfian et al., 2021)	the role of CS and ML in a project	"In this article, we will look at how ML techniques can be used in citizen science and how they can influence volunteer engagement, data collection, and data validation" through a review of several use cases. Authors looked at ML techniques used, impact of ML on CS. Benefits and risks are analysed and suggestions are made for future projects.	"We have reviewed successful citizen science projects, highlighting the typologies of techniques used in such projects and categorizing them in light of the effect of ML on citizen science tasks... we broke down the forms of ML combinations in various CS steps and discussed the benefits and risks of this integration in each step in this article."	"ML algorithms can be used to find and classify the potential target participants based on their interests and to introduce a project to them accordingly ... In order to inform participants regarding the quality of their contributions and to update them regarding the project advancements, automatic informative and user-based feedback can be generated using ML algorithms"
The Role of Citizen Science and Deep Learning in Camera Trapping (Adam et al., 2021)	the role of CS and ML in a project	"Our approach aims to show a new perspective and to update the recent progress in engaging the enthusiasm of citizen scientists and in including machine learning processes into image classification in camera trap research... We have thus developed a conceptual framework and analytical concept for a web-based camera trap database"	"Attributes for motivating users" were identified through interviews with stakeholders: (1) generation of statistical info/overview; (2) map projection; (3) automatic classification; (4) archiving and compressing records; (5) exports of data; (6) "voluntary data embargo while research is active". Classifications by the uploader, volunteer experts, prof. experts and the ML model verify uploads (se…	Identifying individuals and exporting data specifically to specific national faunistic databases.
